1 **pVHL regulates protein stability of TCF/LEF transcription factor family via ubiquitin-**  
2 **independent proteasomal degradation**

3

4 Caixia Wang<sup>1,2#</sup>, Xiaozhi Rong<sup>1,2##</sup>, Haifeng Zhang<sup>1,2</sup>, Bo Wang<sup>1,2</sup>, Yan Bai<sup>1</sup>, Yunzhang Liu<sup>1</sup>,  
5 Ling Lu<sup>1</sup>, Yun Li<sup>1</sup>, Yonghua Sun<sup>3,4</sup>, Chengtian Zhao<sup>5,6</sup>, and Jianfeng Zhou<sup>1,2\*</sup>

6

7 Running title: pVHL modulates protein stability of the TCF/LEF transcription factors

8

9 <sup>1</sup>Key Laboratory of Marine Drugs (Ocean University of China), Chinese Ministry of Education,  
10 and School of Medicine and Pharmacy, Ocean University of China, 5 Yushan Road, Qingdao  
11 266003, China. <sup>2</sup>Laboratory for Marine Drugs and Bioproducts, Pilot National Laboratory for  
12 Marine Science and Technology (Qingdao), Qingdao 266003, China; <sup>3</sup>State Key Laboratory of  
13 Freshwater Ecology and Biotechnology, Institute of Hydrobiology, Innovation Academy for  
14 Seed Design, Chinese Academy of Sciences, Wuhan, China; <sup>4</sup>College of Advanced Agricultural  
15 Sciences, University of Chinese Academy of Sciences, Beijing, China; <sup>5</sup>Institute of Evolution  
16 and Marine Biodiversity and College of Marine Biology, Ocean University of China, 5 Yushan  
17 Road, Qingdao 266003, China; <sup>6</sup>Laboratory for Marine Biology and Biotechnology, Pilot  
18 National Laboratory for Marine Science and Technology (Qingdao), Qingdao 266003, China.

19

20

21 #These authors contributed equally to this work.

22 \*To whom correspondence should be addressed: Jianfeng Zhou, School of Medicine and  
23 Pharmacy, Ocean University of China, 5 Yushan Road, Qingdao 266003, China. Tel.: 86-532-  
24 82032957; Fax: 86-532-82032957; E-mail address: [jfzhou@ouc.edu.cn](mailto:jfzhou@ouc.edu.cn); or, Xiaozhi Rong,  
25 School of Medicine and Pharmacy, Ocean University of China, 5 Yushan Road, Qingdao  
26 266003, China. Tel.: 86-532-82032957; Fax: 86-532-82032957; E-mail address:  
27 [rongxiaozi@ouc.edu.cn](mailto:rongxiaozi@ouc.edu.cn)

28

29

30

31

32 **Keywords:** pVHL, TCF/LEF, ubiquitin-independent proteasomal degradation, Wnt/ $\beta$ -catenin  
33 signaling, dorsal habenular neurons

34

35

36

37

38

39

40

41

42

43

44

45 **Abstract**

46 The Wnt/ $\beta$ -catenin signaling pathway plays key roles in development and adult tissue  
47 homeostasis by controlling cell proliferation and cell fate decisions. In this pathway,  
48 transcription factors TCF/LEFs are the key components to repress target gene expression by  
49 recruiting co-repressors or to activate target gene expression by recruiting  $\beta$ -catenin when the  
50 Wnt signals are absent or present, respectively. While progress has been made in our  
51 understanding of Wnt signaling regulation, the underlying mechanism that regulates the protein  
52 stability of the TCF/LEF family is far less clear. Here, we show that von Hippel-Lindau protein  
53 (pVHL), which is the substrate recognition component in an E3 ubiquitin ligase complex,  
54 controls TCF/LEF protein stability. Unexpectedly, pVHL directly binds to TCF/LEFs and  
55 promotes their proteasomal degradation independent of E3 ubiquitin ligase activity. Knockout  
56 of *vhl* in zebrafish embryos leads to a reduction of dorsal habenular neurons and this effect is  
57 upstream of dorsal habenular neurons phenotype in *pcf712*-null mutants. Our study uncovers a  
58 previously unknown mechanism for the protein stability regulation of the TCF/LEF  
59 transcription factors and demonstrates that pVHL contains a 26S proteasome binding domain  
60 that drives ubiquitin-independent proteasomal degradation. These findings provide new  
61 insights into the ubiquitin-independent actions of pVHL and uncover novel mechanistical  
62 regulation of Wnt/ $\beta$ -catenin signaling.

63  
64  
65  
66  
67  
68  
69  
70  
71  
72  
73  
74  
75  
76  
77  
78  
79  
80  
81  
82  
83  
84  
85  
86  
87  
88

## 89 Introduction

90 The Wnt/ $\beta$ -catenin signaling pathway is an evolutionarily conserved signal transduction  
91 cascade that controls numerous developmental processes and plays crucial roles in the  
92 regulation of diverse processes, including stem cell renewal, cell proliferation, and cell  
93 differentiation during adult tissue homeostasis in multicellular animals (Clevers et al., 2014;  
94 Clevers and Nusse, 2012; MacDonald et al., 2009; Nusse and Clevers, 2017; Steinhart and  
95 Angers, 2018). Dysregulation of the Wnt/ $\beta$ -catenin signaling cascade is often associated with  
96 various kinds of human diseases, including many cancers and hereditary diseases (Anastas and  
97 Moon, 2013; Clevers and Nusse, 2012; MacDonald *et al.*, 2009; Nusse and Clevers, 2017). In  
98 the absence of Wnt ligands, cytosolic  $\beta$ -catenin interacts with a destruction complex consisting  
99 of APC, GSK3, CK1, AXIN1, and  $\beta$ -TrCP, which leads to the phosphorylation of N-terminal  
100 Ser/Thr residues of  $\beta$ -catenin by CK1 and GSK3. Consequently,  $\beta$ -catenin is ubiquitinated and  
101 undergoes proteasome-mediated degradation to maintain the cytoplasmic  $\beta$ -catenin at low  
102 levels (Clevers and Nusse, 2012; MacDonald *et al.*, 2009; Stamos and Weis, 2013). Once Wnt  
103 ligands bind to the Frizzled family transmembrane receptors and LRP5/6 coreceptors, the  
104 disaggregation of the destruction complex is triggered. Consequently,  $\beta$ -catenin is non-  
105 phosphorylated and stabilized, which allows it to accumulate in the cytoplasm and translocate  
106 into the nucleus. In the nucleus, DNA-bound TCF/LEF transcription factors act as  
107 transcriptional repressors by interacting with Groucho proteins, while they can transiently  
108 convert into transcriptional activators upon  $\beta$ -catenin engagement (Clevers and Nusse, 2012;  
109 MacDonald *et al.*, 2009; Nusse and Clevers, 2017). Thus, the ultimate outcome of the Wnt  
110 signal is determined by  $\beta$ -catenin and the TCF/LEFs.

111 All TCF/LEF family members are high-mobility group DNA-binding proteins with multiple  
112 domains for protein interaction and regulation (Clevers and Nusse, 2012; MacDonald *et al.*,  
113 2009). The TCF/LEFs possess a highly conserved high-mobility group DNA-binding domain  
114 (HMG DBD), which consists of an HMG box and a nuclear localization signal and can  
115 recognize and bind specific DNA sequences (Cadigan and Waterman, 2012; Doumpas et al.,  
116 2019). To date, four TCF protein family members have been identified in vertebrate genomes.  
117 Currently available evidence suggests that the relative amounts of  $\beta$ -catenin and TCF in the  
118 nucleus influence the Wnt signaling output (Goentoro and Kirschner, 2009; Phillips and Kimble,  
119 2009). Hence, nuclear TCF/LEF concentrations may be dynamically controlled as precisely as  
120 that of  $\beta$ -catenin (Cadigan and Waterman, 2012). Previous reports have indicated that certain  
121 TCF/LEFs are implicated in the ubiquitin-proteasome pathway (Ishitani et al., 2005; Shy et al.,  
122 2013; Yamada et al., 2006). For example, NARF, a NEMO-like kinase (NLK)-associated RING  
123 finger protein, is an E3 ubiquitin ligase that regulates TCF7L2 and LEF1 ubiquitylation and  
124 degradation (Yamada *et al.*, 2006). Compared with the well understood protein stability  
125 regulation of  $\beta$ -catenin as an effector of the Wnt signaling pathway, however, the stability of  
126 the TCF/LEF proteins is far less clear.

127 Wnt/ $\beta$ -catenin signaling acts as a key regulator in the neurogenesis of the habenula (Beretta  
128 et al., 2013; Carl et al., 2007; Husken and Carl, 2013; Husken et al., 2014). In zebrafish,  
129 habenular neuron types are grossly divided into dorsal and ventral habenular neurons. The  
130 dorsal habenular neuronal clusters (dHb) consist of lateral (dHbl) and medial (dHbm) subnuclei.  
131 The development of dHb is asymmetrical with a left-right difference. The dHbl subnuclei are  
132 larger on the left, whereas the dHbm subnuclei are larger on the right (Concha and Wilson, 2001).

133 Distinct temporal regulation of Wnt/ $\beta$ -catenin signaling is pivotal for the diversity of cell fate  
134 during the asymmetric development of dorsal habenula. Premature activation of Wnt/ $\beta$ -catenin  
135 signaling between 24 and 26 hpf can lead to delayed differentiation of dHb neurons, resulting  
136 in significant reduction in early born dHbl neurons and a mild reduction in late born dHbm  
137 neurons(Guglielmi et al., 2020). In Wnt-overactivated zebrafish *axin1* mutants, dHbl  
138 characterized double-right-sided, which was opposite to dHbl with double-left-sided character in  
139 *pcf712*-null mutant(Carl et al., 2007; Husken et al., 2014). Additionally, inhibition of Wnt/ $\beta$ -  
140 catenin signaling between 34 and 36 hpf leads to an induction of dHbl neurons on the right  
141 side(Husken et al., 2014).

142 The von Hippel-Lindau protein (pVHL) is the target protein recognition subunit of an E3  
143 ubiquitin ligase complex (VBC, including pVHL and elongins B and C)(Kaelin, 2007). Various  
144 natural mutations with inactivation of the *VHL* gene, a tumor suppressor gene, have been  
145 reported in most cases of hereditary von Hippel-Lindau disease and sporadic clear-cell renal  
146 carcinomas (ccRCCs)(Gossage et al., 2015; Kaelin, 2007). pVHL targets prolyl-hydroxylated  
147 proteins(Guo et al., 2016; Ivan et al., 2001; Jaakkola et al., 2001; Zhang et al., 2018). Hypoxia-  
148 inducible factors (HIF- $\alpha$ ), which are prolyl-hydroxylated by EGLN 1/2/3 family proteins under  
149 normal oxygen tension, are the well-documented canonical targets of pVHL. Hydroxylated  
150 HIF- $\alpha$  is bound and recognized by pVHL for ubiquitination-mediated proteasomal  
151 degradation(Ivan et al., 2001; Jaakkola et al., 2001). An earlier study revealed that pVHL binds  
152 to DVL and ubiquitinates it, ultimately promoting DVL degradation via the autophagy-  
153 lysosome pathway(Gao et al., 2010). In addition, pVHL facilitates  $\beta$ -catenin degradation by  
154 stabilizing Jade-1(Berndt et al., 2009; Chitalia et al., 2008). Despite the multiple pVHL  
155 functions in the process of Wnt signaling regulation, it is unknown whether pVHL degrades  
156 proteins independently of the ubiquitin-proteasome and autophagy-lysosome pathways and  
157 what the underlying mechanism is.

158 We previously reported that either overexpression or knockdown of VBP1, a pVHL binding  
159 protein, increased the association between pVHL and TCF/LEFs and attenuated Wnt/ $\beta$ -catenin  
160 signaling via the promotion of the proteasomal degradation of TCF/LEFs(Zhang et al., 2020).  
161 In this process, pVHL is required in the effects of VBP1 on the stability of TCF/LEFs.  
162 Intriguingly, we observed that VBP1 enhances the ubiquitylation of HIF-1 $\alpha$  but fails to induce  
163 the ubiquitylation of Tcf712. This suggested that pVHL likely promotes the proteasomal  
164 degradation of TCF/LEFs with a previously unreported mechanism. In this study, we aim to  
165 elucidate the underlying mechanisms of pVHL action on TCF/LEFs as well as the physiological  
166 role of this action in a model organism.

## 167 Results

### 168 pVHL inhibits Wnt/ $\beta$ -catenin signaling and promotes TCF/LEFs protein degradation

169 pVHL has been suggested to 1) facilitate the ubiquitylation and autophagy-mediated  
170 degradation of DVL2 and 2) downregulate  $\beta$ -catenin through the mediator Jade-1 to reduce  
171 predominantly phospho- $\beta$ -catenin and inhibit Wnt/ $\beta$ -catenin signaling(Chitalia et al., 2008;  
172 Gao et al., 2010). In addition, our previous study reported that VBP1 regulates TCF/LEF  
173 protein stability via pVHL(Zhang et al., 2020). To investigate the underlying mechanism of  
174 pVHL regulation of TCF/LEF protein stability, we examined the effects of pVHL on Wnt-  
175 induced TCF/LEF-dependent transcriptional activity. A TOPFlash reporter plasmid, which  
176 contained Wnt-responsive TCF/LEF binding sites, was transfected into HCT116 cells, and then

177 the transcriptional activity was measured. We observed that pVHL decreased expression of the  
178 TOPFlash reporter in HCT116 cells in a dose-dependent manner (Figure 1A). This observation  
179 was surprising since HCT116 cells are  $\beta$ -catenin constitutively activated by a Ser45 deletion in  
180 one of the  $\beta$ -catenin alleles(Li et al., 2012). We then tested whether pVHL modulates Wnt/ $\beta$ -  
181 catenin signaling at the TCF/LEF level. To this end, pVHL and constitutively active Tcf711  
182 (VP16-Tcf711 $\Delta$ N, a  $\beta$ -catenin-independent VP16-Tcf711 fusion protein lacking the  $\beta$ -catenin-  
183 binding site) were co-transfected into HEK293T cells, and Wnt reporter activity was monitored.  
184 In agreement with the inhibitory effect of VBP1 on VP16-Tcf711 $\Delta$ N-induced Wnt reporter  
185 activity previously reported(Zhang *et al.*, 2020), pVHL also inhibited VP16-Tcf711 $\Delta$ N-induced  
186 Wnt reporter activity in a dose-dependent manner (Figure 1B).

187 To further confirm these results, *VHL*-knockout HEK293T cells were generated using a  
188 CRISPR/Cas9-mediated gene editing approach (Figure 1-figure supplement 1A, B). Two pVHL  
189 protein isoforms, a long form and a short form, have been previously reported(Kaelin, 2007).  
190 The generated *VHL*-knockout lines have a premature termination codon at exon 1, which causes  
191 both isoforms to be depleted (Figure 1C). We measured Wnt luciferase reporter activity after  
192 depletion of pVHL. As expected, knockout of pVHL enhanced basal Wnt reporter activity  
193 (Figure 1C). HEK293T cells were regarded as a Wnt-off cell line. Addition of a GSK3 inhibitor,  
194 6-bromindirubin-3'-oxime (BIO), in HEK293T cells could induce Wnt reporter activity  
195 (Figure 1D). To further examine the effect of *VHL* depletion on Wnt activity, *VHL*-depleted  
196 HEK293T cells were treated with BIO, and the Wnt reporter activity was measured. Knockout  
197 of pVHL further increased Wnt reporter activity in the background of BIO treatment (Figure  
198 1D). Taken together, these results suggested that pVHL inhibits Wnt/ $\beta$ -catenin signaling.

199 pVHL is the substrate recognition component of an E3 ubiquitin ligase complex. Additionally,  
200 VBP1 regulates TCF/LEF protein degradation via pVHL. We speculate that pVHL may  
201 promote VP16-Tcf711 $\Delta$ N protein degradation and prevent its ability to induce the Wnt reporter  
202 activity. To test this hypothesis, we co-transfected Flag-tagged pVHL with Myc-tagged Tcf7,  
203 Tcf711, Tcf712, and Lef1 into HEK293T and HCT116 cells, which were under Wnt-off and Wnt-  
204 on conditions, respectively. The overexpression of pVHL reduced the abundance of Tcf7,  
205 Tcf711, Tcf712, and Lef1 in both cell lines (Figure 1E and F). The HMG DBD (DNA binding  
206 domain) of TCF/LEFs is evolutionarily conserved and nearly identical from invertebrate to  
207 vertebrate(Cadigan and Waterman, 2012). Given that HMG DBD is the most highly conserved  
208 domain in TCF/LEFs and that pVHL can reduce the abundance of four TCF/LEFs, we assume  
209 that pVHL may also downregulate the HMG DBD protein. To prove this hypothesis, pVHL and  
210 Myc-tagged Tcf711-HMG DBD were co-transfected into HEK293T cells. The Tcf711-HMG  
211 DBD protein levels were dramatically reduced by pVHL overexpression (Figure 1G).  
212 Consistent with these results, pVHL decreased the abundance of endogenous TCF7, TCF7L1,  
213 and TCF7L2 proteins in the HEK293T cells in a dose-dependent manner (Figure 1H). Therefore,  
214 pVHL negatively regulates Wnt/ $\beta$ -catenin activity and the TCF/LEF protein level.

215 To determine whether pVHL promotes TCF/LEF protein degradation, we performed a time-  
216 course treatment assay with cycloheximide (CHX), an inhibitor of protein synthesis. When  
217 Flag-tagged pVHL was co-transfected with Myc-tagged Tcf712, the degradation of Myc-tagged  
218 Tcf712 was accelerated (Figure 1I and J). To verify the specificity of pVHL, we measured  
219 protein levels of TCF7, TCF7L1, and TCF7L2 in *VHL*-knockout HEK293T cells. Knockout of  
220 pVHL robustly increased HIF-1 $\alpha$  protein levels. Likewise, knockout of pVHL markedly

221 increased TCF7, TCF7L1, and TCF7L2 protein levels (Figure 1K). Quantitative real-time RT-  
222 PCR analysis showed that knockout of pVHL did not alter the mRNA levels of *TCF7*, *TCF7L1*,  
223 or *TCF7L2* (Figure 1L). Moreover, reintroduction of pVHL into *VHL*-knockout HEK293T cells  
224 neutralized this effect, as the TCF7, TCF7L1, TCF7L2, and HIF-1 $\alpha$  protein levels were  
225 significantly reduced (Figure 1M). To validate this result, we further reintroduced pVHL into  
226 *VHL*-deficient ccRCC 786-O cells. The reintroduction of pVHL led to a reduction in  
227 endogenous TCF7 and TCF7L2 protein levels (Figure 1N). These results suggested that the  
228 *VHL* knockout is specific and that pVHL promotes TCF/LEF protein degradation *in vitro*.

229 We next investigated the effects of pVHL on TCF/LEF degradation *in vivo*. Zebrafish pVhl  
230 is an ortholog of the short human pVHL isoform (van Rooijen et al., 2009). We subjected  
231 zebrafish *vhl*-null mutant embryos to western blot to determine their Tcf7l2 protein levels.  
232 Indeed, knockout of pVhl in zebrafish caused accumulation of Tcf7l2 at the larval stage (120  
233 hpf) (Figure 1O). Taken together, these results suggested that pVHL regulates TCF/LEFs  
234 abundance *in vitro* and *in vivo* and that the effects of pVHL/pVhl on TCF/LEFs are  
235 evolutionarily conserved.

### 236 **pVHL interacts with TCF/LEFs and promotes their proteasomal degradation**

237 To examine whether TCF/LEFs and pVHL interact with each other, four Myc-tagged  
238 TCF/LEF members were expressed in HEK293T cells, and cell lysates were subjected to  
239 immunoprecipitation (IP) with anti-Myc antibody. Co-IP assay showed that endogenous pVHL  
240 interacts with all four TCF/LEF members (Figure 2A). In addition, co-IP assay also indicated  
241 that endogenous TCF7L2 retrieved endogenous pVHL in HEK293T cells (Figure 2B).  
242 Furthermore, purified glutathione-S-transferase (GST)-pVHL protein pulled down all four  
243 Myc-tagged TCF/LEFs *in vitro* (Figure 2C). Likewise, a direct protein-protein interaction  
244 between pVHL and TCF7L2 was also confirmed by a GST pulldown assay (Figure 2D).  
245 Collectively, these data revealed that TCF/LEFs and pVHL directly interact with each other.

246 pVHL recognizes and binds to prolyl-hydroxylated substrates, such as prolyl-hydroxylated  
247 HIF- $\alpha$ , Akt, and ZHX2, in order to exert its function. Three residues (S111, H115, and W117)  
248 in the pVHL hydroxyl-proline binding pocket are critical for pVHL interaction with prolyl-  
249 hydroxylated substrates such as prolyl-hydroxylated HIF-1 $\alpha$  and Akt (Guo *et al.*, 2016).  
250 Mutating these residues in pVHL abolishes its binding activity to prolyl-hydroxylated HIF-1 $\alpha$   
251 and Akt (Guo *et al.*, 2016). The above triple residue-mutated pVHL was therefore utilized to  
252 test whether it has comparable functionality with that of the wild-type pVHL. Like wild-type  
253 pVHL, the pVHL mutant also downregulated abundance of Tcf7L2 (Figure 2E, left panel).  
254 Similarly, this pVHL mutant decreased the Tcf7l1-HMG DBD protein level when it was co-  
255 expressed with Tcf7l1-HMG DBD in HEK293T cells (Figure 2E, right panel). We next applied  
256 a prolyl hydroxylase inhibitor, dimethylxalylglycine (DMOG), to inhibit the activity of EGLN  
257 1/2/3. It has been reported that DMOG treatment inhibits the binding between HIF-2 $\alpha$  and  
258 pVHL and stabilizes HIF-2 $\alpha$  (Guo *et al.*, 2016). This finding was consistent with our result  
259 (Figure 2F). However, DMOG treatment did not reverse Myc-tagged Tcf7l2 protein  
260 downregulation induced by pVHL overexpression (Figure 2F). Therefore, TCF/LEF  
261 degradation by pVHL does not depend on prolyl hydroxylation of TCF/LEFs.

262 A previous report has indicated that chronic starvation-stimulated autophagy negatively  
263 regulates Wnt/ $\beta$ -catenin signaling (Gao *et al.*, 2010). We examined the effects of starvation, an  
264 autophagy stimulus with nutrient deprivation medium, on the expression of endogenous

265 TCF7L2 in HEK293T cells. Chronic starvation reduced the protein levels of both non-p- $\beta$ -  
266 catenin and total  $\beta$ -catenin but not that of TCF7L2 (Figure 2G). This result suggested that  
267 TCF7L2 is not degraded by autophagy.

268 Hypoxic exposure increases the levels of  $\beta$ -catenin and Wnt target effectors LEF1 and TCF7  
269 by stabilizing HIFs in mouse embryonic stem cells (Mazumdar et al., 2010). However, the levels  
270 of  $\beta$ -catenin and TCF7L2 show no such effect in colorectal tumor cells (Kaidi et al., 2007). To  
271 exclude the effect of increased HIFs on TCF/LEF in *VHL*-knockout HEK293T cells, we  
272 examined the protein levels of TCFs with enhanced HIF-1 $\alpha$  expression upon hypoxia treatment.  
273 Hypoxia treatment robustly increased the protein level of HIF-1 $\alpha$ , while the protein levels of  
274 TCF7, TCF7L1, and TCF7L2 were not increased (Figure 2H). Dimerization of HIF-1 $\alpha$  or HIF-  
275 2 $\alpha$  with HIF-1 $\beta$  is mediated by their basic helix-loop-helix (bHLH) and PER-ARNT-SIM (PAS)  
276 domains, which are required for binding to hypoxia response elements (HREs) and HIF-  
277 dependent transcriptional activity (Wu et al., 2015). In this case, we generated *HIF1- $\beta$*  (*ARNT*)  
278 knockout HEK293T cells, targeting exon 6 to disrupt its bHLH and PAS domains (Figure 2-  
279 figure supplement 1A, B). Compared with wild-type cells, the cells with absence of HIF-1 $\beta$  did  
280 not increase TCFs under hypoxia treatment (Figure 2I). Therefore, the level of HIF- $\alpha$  and HIF  
281 activity did not upregulate protein levels of TCFs.

282 To address the possible pathway of TCF/LEF degradation, we used specific small compound  
283 inhibitors, including MG132 (proteasomal inhibitor), NH<sub>4</sub>Cl (lysosomal proteolysis inhibitor),  
284 and 3-MA (autophagy inhibitor), to block the major protein degradation pathway. Addition of  
285 MG132 but not of NH<sub>4</sub>Cl or 3-MA blocked pVHL-mediated TCF/LEF degradation (Figure 2J).  
286 Thus, pVHL likely promotes TCF/LEF degradation via the proteasomal pathway. To verify the  
287 ubiquitylation of TCF/LEF, we performed *in vivo* ubiquitination assays to examine the effects  
288 of pVHL on Tcf7l2 ubiquitination. Myc-Tcf7l2, Flag-HIF-1 $\alpha$ , and pVHL-GFP were co-  
289 transfected into HEK293T cells with HA-tagged ubiquitin. Similar to the effect of VBP1, pVHL  
290 overexpression increased the polyubiquitination level of HIF-1 $\alpha$  while decreased that of Tcf7l2  
291 (Figure 2K). Hence, pVHL did not function as a typical E3 ubiquitin ligase, which usually  
292 catalyzes its targets at its lysine (K) residue(s) to form polyubiquitin chains, to downregulate  
293 TCF/LEF in a manner similar to that for HIF-1 $\alpha$ .

294 We further analyzed evolutionarily conserved lysine residues in several vertebrate TCF/LEF  
295 proteins and found approximately 19 conserved lysine residues in total (Figure 2-figure  
296 supplement 2). We mutated all of them into arginine residues (R) in a Myc-tagged *Xenopus*  
297 Tcf7l2 background (hereafter, Tcf7l2-K/R). We then determined whether pVHL could  
298 downregulate the Tcf7l2-K/R mutant. As expected, pVHL reduced the protein level of the  
299 Tcf7l2-K/R mutant. Moreover, addition of MG132 but not of NH<sub>4</sub>Cl or 3-MA blocked pVHL-  
300 mediated Tcf7l2-K/R mutant degradation (Figure 2L). Taken together, the above results  
301 suggested that pVHL promotes TCF/LEF proteasomal degradation independently of ubiquitin  
302 function.

303 To validate that pVHL-mediated TCF/LEF degradation does not rely on E3 ubiquitin ligase  
304 activity, we tested the effects on TCF/LEFs by naturally occurring and cancer-associated pVHL  
305 point mutants L158P and R167W and the truncated mutant pVHL (1-157). All three greatly  
306 reduced or diminished elongin B/C binding capability and abolished E3 ligase activity (Duan et  
307 al., 1995; Iwai et al., 1999; Ohh et al., 1998). When these mutants were co-expressed with Myc-  
308 tagged Tcf7l2 in HEK293T cells, they exhibited the same effects on the abundance of Tcf7l2

309 protein and VP16-Tcf711 $\Delta$ N-induced Wnt reporter activity as wild-type pVHL (Figure 3A and  
310 B). Similar effects were observed when each mutant was co-expressed with Tcf711-HMG DBD  
311 (Figure 3C). We also examined whether these pVHL mutants without E3 ligase activity could  
312 downregulate the Tcf712-K/R mutant. Like wild-type pVHL, they all reduced the Tcf712-K/R  
313 mutant protein levels (Figure 3D). Moreover, we performed a CHX treatment time-course to  
314 test whether pVHL (1-157) overexpression accelerated Myc-tagged Tcf712 protein turnover. As  
315 wild-type pVHL, pVHL (1-157) also downregulated Tcf712 protein and shortened its half-life  
316 (Figure 3E and F).

317 We next introduced wild-type pVHL and the pVHL (1-157) mutant into *VHL*-knockout  
318 HEK293T cells and measured TCF/LEF protein levels. As with wild-type pVHL, introduction  
319 of pVHL (1-157) into *VHL* knockout HEK293T cells decreased TCF7, TCF7L1, and TCF7L2  
320 protein accumulation by depleting *VHL*, while the HIF-1 $\alpha$  protein level was reduced by wild-  
321 type pVHL rather than by the pVHL (1-157) mutant (Figure 3G). Therefore, pVHL (1-157) and  
322 wild-type pVHL had comparable effects on TCF/LEF downregulation. In addition, we used  
323 developing zebrafish embryos to determine the effects of human pVHL and pVHL (1-157) on  
324 the promotion of Tcf712 degradation *in vivo*. Thus, we generated *in vitro* transcribed *GFP*, *VHL*-  
325 *P2A-GFP*, or *VHL (1-157)-P2A-GFP* mRNA and injected them into zebrafish embryos. In the  
326 pVHL-P2A-GFP or pVHL (1-157)-P2A-GFP fusion proteins, GFP can be removed by the “self-  
327 cleaving” small peptide 2A and used as an indicator to confirm protein expression of pVHL and  
328 pVHL (1-157) in zebrafish embryos (Figure 3H). Like *GFP* mRNA-injected groups, the GFP  
329 signals in the *VHL-P2A-GFP* and *VHL (1-157)-P2A-GFP* mRNA-injected group could be  
330 observed at the shield stage, suggesting that pVHL and pVHL (1-157) proteins were  
331 successfully and highly expressed (Figure 3H). Western blot showed that the Tcf712 protein  
332 levels were dramatically reduced in wild-type zebrafish embryos injected with *VHL-P2A-GFP*  
333 or *VHL (1-157)-P2A-GFP* mRNA, indicating that the effect of pVHL/pVhl on Tcf712 is  
334 evolutionarily conserved *in vivo* (Figure 3I). In addition, introduction of human *VHL* mRNA  
335 also decreased Tcf712 protein levels in *vhl*-null mutant background (Figure 3J). The *VHL (1*-  
336 *157)* mRNA had a similar effect on Tcf712 in *vhl*-null mutant embryos (Figure 3J). Collectively,  
337 these data implied that pVHL does not function as an E3 ligase complex adaptor to promote  
338 TCF/LEF degradation.

### 339 **The pVHL substrate recognition domain is required to downregulate the TCF/LEF** 340 **protein**

341 To identify the functional pVHL domain(s) essential for promoting TCF/LEF degradation,  
342 various pVHL domain-deleted mutants were generated (Figure 4A). Using Co-IP assay, we  
343 mapped the domain(s) putatively responsible for the interaction between pVHL and TCF/LEFs.  
344 A region comprising amino acid (aa) residues 100-157 was required for its interaction with  
345 Tcf712 (Figure 4B). We then mapped the pVHL domain(s) required for promoting Tcf712  
346 degradation. Deletion of aa 54-99 or aa 100-157 in pVHL diminished its downregulation effect  
347 on Tcf712 protein compared with that of wild-type pVHL (Figure 4C). We further investigated  
348 whether aa 54-99 or aa 100-157 of pVHL regulated Wnt reporter activity. Deletion of either  
349 region in pVHL diminished its inhibitory effect on VP16-Tcf711 $\Delta$ N-induced Wnt reporter  
350 activity (Figure 4D). Deletion of aa 54-99 or aa 100-157 also abolished pVHL-mediated Tcf712-  
351 K/R mutant degradation ability (Figure 4E). Therefore, aa 54-99 or aa 100-157 in pVHL is  
352 necessary to promote Tcf/Lef degradation.



353 To confirm whether aa 54-99 and aa 100-157 in pVHL suffice to promote TCF/LEF protein  
354 degradation, we generated GFP-tagged pVHL (54-99), pVHL (100-157), and pVHL (54-157)  
355 and evaluated their downregulation effects on TCF/LEF. Neither pVHL (54-99) nor pVHL  
356 (100-157) reduced Myc-tagged Tcf7l2 protein levels (Figure 4F). However, pVHL (54-157)  
357 was as effective at promoting TCF7L2 degradation as full-length pVHL (Figure 4F). pVHL  
358 (54-157) but not pVHL (54-99) or pVHL (100-157) inhibited VP16-Tcf7l1ΔN-induced  
359 TOPFlash reporter activity (Figure 4G). Additionally, pVHL (54-157) had the same capability  
360 as wild-type pVHL to reduce TCF/LEF protein levels in *VHL*-depleted HEK293T cells, while  
361 such effects were not observed on HIF-1α protein levels (Figure 4H). These results implied that  
362 pVHL (54-157) is necessary and sufficient to promote TCF/LEF protein degradation. In  
363 addition, these results also suggested that substrate recognition by pVHL as a component of E3  
364 ubiquitin ligase is not required for TCF/LEF protein downregulation.

365 We next mapped the binding domain(s) of TCF/LEFs to pVHL. To define the domain(s) of  
366 TCF7L2 interacting with pVHL, a variety of domain-deleted mutants of TCF7L2 were  
367 generated based on conserved functional motifs (Figure 4I). To ensure the nuclear localization  
368 of each deletion mutant of TCF7L2, all of the mutants contained a nuclear localization signal  
369 (NLS). Co-IP analysis showed that deletion of aa 63-410, rather than deletion of other regions  
370 of TCF7L2, led to loss of the binding capability of TCF7L2 to pVHL (Figure 4J and Figure 4-  
371 figure supplement 1A-B). These results suggested that aa 63-410 of TCF7L2, containing both  
372 a TLE/Groucho binding domain and an HMG domain, is required for interaction with pVHL.  
373 Consistently, pVHL had little effect on the protein levels of the TCF7L2Δ(63-410) mutant,  
374 whereas overexpression of pVHL led to marked reduction in protein levels of other deletion  
375 mutants of TCF7L2 (Fig. 4K and Figure 4-figure supplement 1C). Immunostaining results  
376 confirmed that both TCF7L2(63-410) and TCF7L2Δ(63-410) mutants localized in the nucleus  
377 (Figure 4-figure supplement 1D). Altogether, we concluded that aa 63-410 of TCF7L2 is crucial  
378 for pVHL binding.

### 379 **pVHL directly interacts with the 26S proteasome**

380 Several proteins, such as Parkin and Rad23, contain a ubiquitin-like domain (UBL), which  
381 is likely to interact and form a complex with RPN10 in the 19S regulatory subunit of the 26S  
382 proteasome and mediate substrate degradation (Hiyama et al., 1999; Sakata et al., 2003;  
383 Upadhyaya and Hegde, 2003). We hypothesized that pVHL has ubiquitin-independent  
384 proteasomal degradation activity to bridge TCF/LEF protein degradation. Therefore, we tested  
385 whether pVHL directly interacts with the 26S proteasome. An *in vitro* pulldown experiment on  
386 purified human 26S proteasome and recombinant GST-pVHL revealed that pVHL bound to the  
387 19S regulatory subunit RPN10 and, therefore, directly interacted with the 26S proteasome  
388 (Figure 5A). Furthermore, we also performed a Co-IP assay in HEK293T cells with Flag-tagged  
389 pVHL to investigate whether pVHL and the 26S proteasome interact *in vivo*. As shown in  
390 Figure 5B, the endogenous 19S regulatory subunit RPN10 co-immunoprecipitated with pVHL.  
391 As deletion of either aa 54-99 or aa 100-157 disrupted pVHL-mediated TCF7L2 degradation,  
392 we endeavored to establish which region is vital for the interaction between pVHL and the 26S  
393 proteasome. The *in vitro* pulldown assays showed that neither recombinant GST-pVHL(54-99)  
394 nor GST-pVHL(100-157) binds to the 19S regulatory subunit RPN10 in purified human 26S  
395 proteasome. In contrast, GST-pVHL(54-157) does bind to the 19S regulatory subunit RPN10  
396 (Figure 5C). These results implied that pVHL directly interacts with the 26S proteasome and

397 that pVHL(54-157) alone suffices for this binding. Taken together, these results suggested that  
398 the pVHL forms a complex between RPN10 of the 26S proteasome and the TCF/LEFs to  
399 mediate TCF/LEF degradation (Figure 5D).

#### 400 **pVhl functions upstream of Tcf7l2 to support dHbl and dHbm character**

401 *Vhl*-knockout mice were embryonic lethal and died between E11.5 and 12.5 because of  
402 hemorrhagic lesions in the placenta(Gnarra et al., 1997). This limited us to investigate  
403 physiological function of Tcf/Lef protein degradation by pVhl. To further uncover the effect of  
404 pVHL on TCF/LEF protein degradation *in vivo*, we used a zebrafish *vhl*-null line, which was  
405 generated by a CRISPR/Cas9-based gene editing approach(Du et al., 2015). Wnt/ $\beta$ -catenin  
406 signaling influences axis formation, including anteroposterior, dorsoventral, and left-right body  
407 axis, in vertebrates(Petersen and Reddien, 2009). The *vhl*-null mutant embryos were  
408 morphologically indistinguishable from sibling embryos at 48 hpf, while a slightly reduced  
409 anterior head end in *vhl*<sup>-/-</sup> mutant embryos was observed at 96 hpf (Figure 6-figure supplement  
410 1A and D). To further confirm this result, we measured the body length of embryos at 48 hpf  
411 and 96 hpf (Figure 6-figure supplement 1B, E). At 48 hpf, the body length of sibling and mutant  
412 embryos showed no significant difference (Figure 6-figure supplement 1C). At 96 hpf, the head  
413 length in *vhl*-null embryos was shorter than that in sibling embryos, while the trunk length did  
414 not exhibit any difference (Figure 6-figure supplement 1F). These results suggested that pVhl  
415 is unlikely to play any role in directing dorsoventral or anteroposterior axis formation.

416 Furthermore, left-right asymmetry and laterality of the heart, visceral organ, and brain were  
417 examined. Almost all of the offspring of *vhl* heterozygous mutant showed normal expression  
418 of heart marker *cmlc2* at 28 and 48 hpf (Figure 6-figure supplement 2A and B), normal  
419 expression of liver and pancreas marker *foxa3* at 48 hpf (Figure 6-figure supplement 2C), and  
420 normal expression of liver marker *cp* at 48 hpf (Figure 6-figure supplement 2D). Consistently,  
421 the expressions of Nodal ligand *spaw* in the lateral plate mesoderm (LPM), Nodal target genes  
422 *lefty1* and *pitx2* in the epithalamus, *pitx2* in the posterior left LPM, and *lefty2* in the heart  
423 primordia were not altered at the 23-somite stage (Figure 6-figure supplement 2E-G). These  
424 results suggested that depletion of pVhl does not affect expression of left-side Nodal signaling  
425 and subsequent organ positioning.

426 Knockout of pVHL increases TCF/LEF protein levels and enhances Wnt/ $\beta$ -catenin signaling  
427 *in vitro*. Additionally, the zebrafish *vhl*-null mutant embryos exhibit increased Tcf7l2 protein  
428 levels. In particular, Wnt ligands, Axin1/2, and Tcf7l2 are expressed in the diencephalon and  
429 regulate dorsal habenula development(Carl et al., 2007; Husken et al., 2014; Kuan et al., 2015).  
430 Therefore, we next tested whether depletion of pVhl affects Tcf7l2 protein levels in dorsal  
431 habenula and habenular neuron development in zebrafish embryos. We monitored the  
432 expression of Tcf7l2 on the left and right sides of dHb neurons at 37 hpf, which is immediately  
433 after initial Tcf7l2 protein expression in dHb neurons(Husken et al., 2014). The *vhl*-null mutant  
434 embryos exhibit increased numbers of Tcf7l2<sup>+</sup> cells on both the left and right sides of dHb  
435 neurons (Figure 6A, B), further suggesting that depletion of pVhl increases expression of Tcf7l2  
436 protein. Moreover, we observed that, at 48 hpf, depletion of pVhl strongly reduced the numbers  
437 of GFP<sup>+</sup> cells in *vhl*-null mutant embryos with a *Tg(huc:GFP)* transgenic background (Figure  
438 6C, D). This phenotype did not result from growth retardation since body length, the  
439 quantitative indicator of developmental rate, showed no differences between the wild-type and  
440 *vhl*-null groups (Figure 6-figure supplement 1A-C). We noticed that this phenotype is

441 reminiscent of embryos after premature activation of Wnt/ $\beta$ -catenin signaling between 24 to 26  
442 hpf, which also delays habenular neuron differentiation with reduced the numbers of GFP<sup>+</sup> cells  
443 in embryos at this stage(Guglielmi *et al.*, 2020).

444 The increased expression of Tcf712 protein in dHb neurons may function in premature  
445 activation of Wnt/ $\beta$ -catenin signaling and then lead to delayed habenular neuron differentiation.  
446 To test this, we examined the epistatic relationship between null mutations in *vhl* and *tcf712* by  
447 inspecting the expression of dHbl marker *kctd12.1* and dHbm marker *kctd8* in progeny embryos  
448 of *vhl/tcf712* double heterozygous mutants at 96 hpf. Compared with that in wild-type sibling  
449 embryos, expression of *kctd12.1* was strongly reduced, while that of *kctd8* was less strongly  
450 reduced in *vhl*-null embryos (Figure 6E), which was consistent with expression in 96 hpf  
451 embryos treated with LiCl or BIO between 24 and 26 hpf(Guglielmi *et al.*, 2020). Consistent  
452 with the findings of a previous study(Husken *et al.*, 2014), *tcf712*-null mutant embryos showed  
453 enhanced expression of *kctd12.1* and reduced expression of *kctd8* (Figure 6E). Considering that  
454 pVhl promotes Tcf712 proteasomal degradation, pVhl should act upstream of Tcf712. If the  
455 phenotype of *vhl*<sup>-/-</sup> mutants depends on enhanced expression of Tcf712 protein, the strongly  
456 reduced *kctd12.1* expression and less strongly reduced *kctd8* expression should not be observed  
457 in *vhl/tcf712* double mutants, instead of the phenotype of *tcf712* single mutant. In other words,  
458 the expression of *kctd12.1* and *kctd8* in a *tcf712*<sup>-/-</sup> background should be enhanced and reduced  
459 respectively, irrespective of the presence or absence of pVhl function. As expected, the  
460 expression of *kctd12.1* and *kctd8* in *vhl/tcf712* double mutants was consistent with that in *tcf712*  
461 single mutant embryos (Figure 6E). We quantified the expression area of left lateral *kctd12.1* in  
462 Figure 6E. Significant reduction was only observed in *vhl* single mutant embryos (Figure 6F).  
463 Collectively, these results suggested that pVhl likely acts upstream of Tcf712 and plays a  
464 specific role in dorsal habenula development.

#### 465 **Discussion**

466 The TCF/LEF transcription factor family includes four members that display distinct and  
467 sometimes redundant functions. In this study, we discovered that pVHL directly interacts with  
468 all four TCF/LEF family members and promotes their degradation via a ubiquitin-independent  
469 proteasomal degradation mechanism. In this way, pVHL regulates TCF/LEF protein abundance  
470 and may therefore be crucial in the Wnt/ $\beta$ -catenin signaling cascade in the nucleus, which  
471 ensures elaborate and temporal control of the output of this signaling. Using *vhl*- and *tcf712*-  
472 knockout zebrafish, we found that pVhl functions in regulating the development of dorsal  
473 habenular neurons in zebrafish embryos and likely acts by modulating the protein stability of  
474 Tcf712.

475 It has been reported that Lef1, Tcf7, and Tcf712 act as  $\beta$ -catenin-dependent transcriptional  
476 activators, whereas Tcf711 functions as a transcriptional repressor(Cole *et al.*, 2008; Kim *et al.*,  
477 2000; Merrill *et al.*, 2004; Yi *et al.*, 2011). In addition, Wnt activation promotes  $\beta$ -catenin  
478 binding and inactivates Tcf711 but not Lef1, Tcf7, or Tcf712 by reducing the chromatin  
479 occupancy of Lef1 and secondarily stimulates Lef1 protein degradation by proteasome in  
480 embryonic stem cells, but the underlying mechanism is not clear(Shy *et al.*, 2013). Regulation  
481 of TCF/LEF protein stability is an important but poorly understood issue. Ishitani *et al.* (2005)  
482 reported that MG132 treatment stabilizes LEF1 and increases its ubiquitination level, while  
483 deletion of the LEF1 C-terminus reduces ubiquitination to a lesser extent. LEF1 is degraded by  
484 the ubiquitin-proteasome pathway, and its ubiquitination sites may be located in its C-terminal

485 region(Ishitani *et al.*, 2005). Yamada et al. (2006) reported that the E3 ubiquitin-ligase NARF  
486 ubiquitylates TCF7L2 and LEF1 and promotes their degradation via the proteasome pathway.  
487 These findings suggest that some TCF/LEF protein stability is regulated and also degraded via  
488 the ubiquitin-proteasome pathway. Recently, we found that VBP1, a pVHL binding protein,  
489 promotes TCF/LEFs protein proteasomal degradation when pVHL is present(Zhang *et al.*,  
490 2020). In this study, we further demonstrated that pVHL promotes the degradation of all four  
491 TCF/LEF members. Intriguingly, this function of pVHL is not dependent on its E3 ubiquitin  
492 ligase activity but on an unexpected ubiquitin-independent proteasome pathway. This discovery  
493 suggested that TCF/LEF can undergo the ubiquitin-independent proteasome pathway.

494 We made several findings in this study: First, TCF/LEF transcription factors are pVHL  
495 substrates. In contrast, pVHL binds to its canonical substrates HIF- $\alpha$ , Akt, and ZHX2, which  
496 undergo prolyl hydroxylation and are recognized by the hydroxyl-proline binding pocket in  
497 pVHL. TCF7L2 is degraded by pVHL as well as by pVHL with mutated hydroxyl-proline  
498 binding pocket sites. Prolyl hydroxylase inhibitor had little effect on the promotion of TCF7L2  
499 degradation by pVHL. Therefore, TCF/LEFs are degraded by pVHL without prolyl  
500 hydroxylation. Second, pVHL promotes TCF/LEF degradation via its aa 54-157 region in a  
501 manner independent of E3 ubiquitin ligase activity. The aa 54-157 region is necessary and  
502 sufficient for TCF/LEF degradation by pVHL. Within this region, the aa 100-157 region is  
503 critical for pVHL binding to TCF7L2. pVHL promotes TCF/LEF degradation in both  
504 HEK293T cells and HCT116 cells. In addition, we observed that depletion of pVHL in  
505 HEK293T cells amplified BIO treatment-induced Wnt reporter activity. Therefore, pVHL  
506 promotes the proteasomal degradation of TCF/LEFs in the Wnt-off and Wnt-on states. Third,  
507 pVHL promotes TCF/LEF proteasomal degradation via a heretofore unknown ubiquitin-  
508 independent pathway, and pVHL (54-157) binds directly to the 19S regulatory subunit RPN10  
509 of the 26S proteasome.

510 Another interesting observation made in this study is that pVhl regulates the development of  
511 dHb neurons in zebrafish embryos likely by modulating the protein stability of Tcf7l2.  
512 Knockout of pVhl leads to a reduction in dHb neurons, which was evidenced not only by a  
513 specific reduction in the number of HuC:GFP<sup>+</sup> cells in differentiating habenular neurons but  
514 also by a reduction in expression area of indicative markers of dHbl and dHbm at later stages;  
515 however, organ positioning and left-side Nodal signaling in *vhl*-null mutants were not altered.  
516 This is different from the phenotype of *axin1* mutant embryos, which exhibit bilateral  
517 expression of the Nodal pathway genes in the epithalamus and unaffected left-side Nodal  
518 signaling and organ positioning within the LPM(Carl *et al.*, 2007). In contrast, the above  
519 phenotype in *vhl*-null mutants produces phenocopied embryos after treatment with LiCl or BIO  
520 between 24 and 26 hpf, leading to premature activation of Wnt signaling(Guglielmi *et al.*, 2020).  
521 Overactivation of Wnt/ $\beta$ -catenin signaling in the gastrulation or mid-somite stage disrupts the  
522 laterality of Nodal pathway expression in both the LPM and brain(Carl *et al.*, 2007; Lin and  
523 Xu, 2009). However, these effects were not observed in *vhl*-null mutants. Thus, it seems  
524 unlikely that the phenotype in *vhl*-null mutants results from the possibly increased activity of  
525 Wnt/ $\beta$ -catenin signaling in the gastrulation or mid-somite stage by depletion of pVhl.  
526 Alternatively, this phenotype may arise from the initial increased Tcf7l2 expression in dHb  
527 neurons, which causes temporally and locally increased Wnt activity. Future studies will be  
528 needed to determine the comprehensive developmental basis underlying the phenotype after

529 depletion of zebrafish pVhl. Indeed, the *vhl*-null mutation is upstream of functional Tcf712, as  
530 shown by an epistatic analysis between *vhl*-null and *tcf712*-null mutations. As mentioned earlier,  
531 TCF/LEF family in vertebrates contains four members. Disruption of any one results in a  
532 distinct phenotype (Cadigan and Waterman, 2012). Future efforts are needed to investigate the  
533 potential physiological effect of interaction between pVHL and distinct member of TCF/LEF  
534 family.

535 In summary, our study identified that TCF/LEF is degraded by pVHL via a ubiquitin-  
536 independent proteasomal degradation pathway. Importantly, we further showed that pVhl is  
537 involved in the development of dHb neurons in zebrafish embryos and likely functions by  
538 promoting the degradation of Tcf712. Therefore, regulation of the stability of TCF/LEF protein  
539 is as important as that of  $\beta$ -catenin protein in Wnt signaling pathway, as both of them control  
540 the Wnt signaling output. pVHL regulates the degradation of DVL,  $\beta$ -catenin, and TCF/LEFs,  
541 suggesting that pVHL likely plays an essential role in controlling the Wnt signaling output by  
542 regulating the protein levels of the key components of Wnt signaling at different signal levels.  
543 An earlier study suggested that the promoter of *VHL* responds to  $\beta$ -catenin/TCF7L2 and that  
544 pVHL has interplay with the Wnt/ $\beta$ -catenin pathway during colorectal tumorigenesis (Giles et  
545 al., 2006). Our findings identify a mechanistic connection between these two important  
546 signaling pathways and may facilitate deeper understanding of the interplay between the pVHL  
547 and Wnt/ $\beta$ -catenin signaling pathways in embryogenesis, organogenesis, and even diseases.  
548 Moreover, pVHL is a well-known tumor suppressor, as up to 92% of clear cell renal carcinomas  
549 have an inactivated *VHL* gene. Upregulated Wnt/ $\beta$ -catenin signaling might also contribute to  
550 renal carcinogenesis associated with *VHL* mutations (Saini et al., 2011). These findings made  
551 herein link pVHL to oncogenic Wnt/ $\beta$ -catenin signaling at the TCF/LEF level. The efforts to  
552 determine that pVHL mediates substrate degradation by direct interaction and complexation  
553 with the 26S proteasome should have broad utility for better understanding the physiological  
554 role and molecular function of pVHL in the future.

## 555 **Materials and Methods**

### 556 **Chemicals, reagents, and antibodies**

557 Dulbecco's modified Eagle's medium (DMEM) was purchased from Hyclone (Logan, UT,  
558 USA). Fetal bovine serum (FBS) was purchased from PAN (Aidenbach, Germany). Protein  
559 A/G Plus-agarose was purchased from Santa Cruz Biotechnology (Dallas, TX, USA). The  
560 antibodies used included the following: rabbit anti-TCF7L2 (1:1,000 for western blotting and  
561 2  $\mu$ g for co-IP assays; #2569; Cell Signaling Technology, Danvers, MA, USA), rabbit anti-  
562 TCF7 (1:1,000 for western blotting; #2203; Cell Signaling Technology), rabbit anti-TCF7L1  
563 (1:1,000 for western blotting; #2883; Cell Signaling Technology, Danvers, MA, USA), mouse  
564 anti-TCF7L1/TCF7L2 (1:500 for whole mount immunohistochemical staining; #ab12065;  
565 Abcam, Cambridge, UK), rabbit anti-pVHL (1:1,000 for western blotting, #68547; Cell  
566 Signaling Technology), mouse anti-pVHL (1:1,000 for western blotting, sc-135657; Santa Cruz  
567 Biotechnology), rabbit anti-proteasome 19S S5A (1:1,000 for western blotting; ab137109;  
568 Abcam, Cambridge, UK), mouse anti-HIF-1 $\alpha$  (1:1,000 for western blotting; 610958,  
569 BDBioscience, Franklin Lakes, NJ, USA), rabbit anti-HIF-2 $\alpha$  (1:1,000 for western blotting; NB  
570 100-122; Novus Biologicals, Centennial, CO, USA), rabbit anti-HIF-1 $\beta$  (1:1,000 for western  
571 blotting; A19532, ABclonal, Wuhan, China), rabbit anti-GAPDH (1:1,000 for western blotting;  
572 D110016; BBI, Crumlin, UK), rabbit anti-Histone H3.1 (1:1,000 for western blotting; #P30266;

573 Abmart, Shanghai, China), mouse anti-Myc (1:1,000 for western blotting and 2 µg for co-IP  
574 assays; sc-40; Santa Cruz Biotechnology), and mouse anti-Flag (1:1,000 for western blotting  
575 and 2 µg for co-IP assays; F1804; Sigma, St. Louis, MO, USA). Primers and sequence  
576 information are provided in Supplementary Table S1.

#### 577 **Molecular cloning and plasmid construction**

578 The plasmids pCS2-6×Myc-Tcf7, pCS2-6×Myc-Tcf7l1, pCS2-6×Myc-Tcf7l2, and pCS2-  
579 6×Myc-Lef1 were gifts from Dr. Wei Wu (School of Life Sciences, Tsinghua University, China).  
580 pCS2-Flag-pVHL, pGEX-2T-pVHL, pGEX-2T-pVHL(54-99), pGEX-2T-pVHL(100-157),  
581 pGEX-2T-pVHL(54-157), pCS2-VP16-Tcf7l1ΔN, and pCDNA3-HA-Ub, pBoBi-puro-GFP,  
582 pBoBi-puro-Flag-pVHL, pCS2-pVHL-P2A-GFP, and pCS2-pVHL(1-157)-P2A-GFP were  
583 generated by PCR subcloning. The VHL mutants pVHLΔ(1-53), pVHLΔ(54-99), pVHLΔ(100-  
584 157), pVHLΔ(158-213), pVHL(1-157), pVHL(54-99), pVHL(100-157), and pVHL(54-157)  
585 were amplified by PCR and subcloned into pCS2-Flag or pCS2-eGFP. The pCS2-Flag-pVHL  
586 L158P and pCS2-Flag-pVHL R167W mutants were generated by site-directed mutagenesis.

#### 587 **Zebrafish strains**

588 Zebrafish (*Danio rerio*) Tübingen wild-type, the transgenic line *Tg(huc:GFP)*, and the *vhl*-  
589 null and *tcf7l2*-null strains were maintained on a 14h light/10h dark cycle at 28.5 °C and fed  
590 twice daily. The zebrafish *vhl* mutant strain was gifted by Dr. Wuhan Xiao (Du *et al.*, 2015). The  
591 zebrafish *tcf7l2* mutant allele (*tcf7l2*<sup>+/*ihb316*</sup>, ZFIN ID: ZDB-ALT-181129-11) was generated by  
592 the CRISPR/Cas9 method and obtained from the China Zebrafish Resource Center, National  
593 Aquatic Biological Resource Center (CZRC/NABRC), Wuhan, China. The animals were raised  
594 and maintained according to standard procedures described in Zebrafish Information Network  
595 (ZFIN; <https://zfin.org/>). Embryos obtained by natural crosses were maintained in embryo  
596 rearing solution in an incubator at 28.5°C. The embryos were staged according to standard  
597 methods (Kimmel *et al.*, 1995). All experimental protocols were approved by and conducted in  
598 accordance with the Ethical Committee of Experimental Animal Care, Ocean University of  
599 China.

#### 600 **Cell lines and transfections**

601 HEK293T, HeLa, HCT116, and 786-O cell lines were purchased from the American Type  
602 Culture Collection (ATCC; Manassas, VA, USA). HEK293T, HeLa, and HCT116 cells were  
603 cultured in DMEM supplemented with 10% FBS and 1% penicillin/streptomycin at 37 °C in 5%  
604 CO<sub>2</sub>. The 786-O cells were cultured in RPMI medium supplemented with 10% FBS and 1%  
605 penicillin/streptomycin at 37 °C in 5% CO<sub>2</sub>. Hypoxia-treated cells were performed in a hypoxic  
606 chamber containing 1% O<sub>2</sub> at 37 °C for 24 h as reported previously (Zhang *et al.*, 2014). For  
607 starvation treatment, HEK293T cells were washed twice with DMEM and cultured under serum  
608 starvation in a time series. In some experiments, MG132 (10 µM) was used to treat cells for 8  
609 h to inhibit proteasome activity, or NH<sub>4</sub>Cl (25 mM) was used to disrupt lysosome function, or  
610 3-MA (5 mM) was used to inhibit autophagy. DMOG (200 µM) was added to cultured  
611 HEK293T cells for 12 h to antagonize prolyl hydroxylase. Plasmid transfection was performed  
612 using polyethylenimine (#23966-2; Polysciences Inc., Warrington, PA, USA) following the  
613 manufacturer's instructions. To generate Flag-pVHL stable cells, packaging of lentiviral *VHL*  
614 cDNA expressing viruses and subsequent infection of 786-O cell line were performed.  
615 Following viral infection, cells were maintained in the presence of puromycin (1 µg/mL).  
616 Knock-in efficiency of Flag-pVHL was examined by immunoblotting assay.

## 617 **GST fusion protein purification and *in vitro* GST pulldown assays**

618 GST-pVHL, GST-pVHL(54-99), GST-pVHL(100-157) and GST-pVHL(54-157) were  
619 expressed in *E. coli* BL21. The fermentation broth was started with 1% inoculant incubated at  
620 37°C with agitation at 150 rpm until OD<sub>600</sub> = 0.6 ~ 0.8. Fusion proteins were induced with 1  
621 mM IPTG at 37 °C for 5 h. Cells were harvested by centrifugation, washed with ice-cold  
622 phosphate-buffered saline (PBS), and lysed by sonication in lysis buffer (50 mM Tris at pH 7.5,  
623 150 mM NaCl, 1 mM EDTA, 10% glycerol, and 1% Triton X-100) on ice. The GST and GST  
624 fusion protein extracts were mixed with glutathione Sepharose 4B beads (71024800-GE; GE  
625 Healthcare, Chicago, IL, USA) overnight at 4 °C and the mixtures were then washed three times  
626 with ice-cold PBS. To test the direct interaction between pVHL and Tcfs, the mixtures were  
627 centrifuged, and the precipitates were diluted with equal volumes of the indicated HEK293T  
628 cell lysates and mixed by rotation overnight at 4 °C. After extensive washing with lysis buffer,  
629 the precipitated proteins were eluted by SDS/PAGE. Bound proteins were detected either with  
630 the indicated antibodies or by Coomassie blue staining. To test the direct interaction between  
631 pVHL and proteasome, the bait GST or GST fusion protein was incubated with purified human  
632 26S proteasome (E365; Boston Biochem, Cambridge, MA, USA) at 4 °C for 2 h in binding  
633 buffer (1× PBS, 2 mM EDTA, 1 mM phenylmethylsulfonyl fluoride, and 0.5% Triton X-100).  
634 After washed three times, and the bound proteins were analyzed by western blot.

## 635 **Luciferase assays**

636 The cells were transfected with TOPFlash reporter. Transfection efficiency was normalized  
637 by co-transfection with a *Renilla* reporter. Cells were lysed with 1× passive lysis buffer  
638 (Promega, Madison, WI, USA). TOPFlash/*Renilla* luciferase assays were performed using the  
639 dual-luciferase reporter assay kit (Promega) according to the manufacturer's instructions.

## 640 **Cycloheximide chase assay**

641 HEK293T cells were co-transfected with Myc-Tcf712 and an empty vector, Flag-pVHL or  
642 Flag-pVHL (1-157). After 16 h, the cells were treated with CHX (100 µg/mL) and harvested at  
643 the indicated time points. Lysates were prepared and subjected to immunoblot analysis. Protein  
644 stability was determined from the percentage of GAPDH-normalized Tcf712 remaining at an  
645 indicated point relative to the initial time point.

## 646 **Ubiquitination assay**

647 Ubiquitination assays were performed using hot lysis-extracted protein lysates according to  
648 a described protocol (Du et al., 2016). Briefly, HEK293T cells were treated with 10 µM MG132  
649 for 8 h before being harvested, and the cells were hot-lysed by boiling in 100 µL denaturing  
650 buffer (2% SDS, 10 mM Tris-HCl [pH 8.0], 150mM NaCl, and 1× protease inhibitor mixture  
651 with 10 mM freshly prepared N-ethylmaleimide) for 10 min. The lysates were diluted ten-fold  
652 with dilution buffer (1% Triton X-100, 10 mM Tris-HCl [pH 8.0], 150 mM NaCl, 2 mM EDTA,  
653 and 1× protease inhibitor mixture with 10 mM freshly prepared N-ethylmaleimide). Tcf712 and  
654 HIF-1α were immunoprecipitated from whole-cell lysate by incubating it with the appropriate  
655 antibodies and Protein A/G resin. Ubiquitinated Tcf712 and HIF-1α were detected by  
656 immunoblot using the indicated antibodies.

## 657 **Western blot and immunoprecipitation**

658 Cells or zebrafish embryos were lysed in RIPA buffer (150 mM NaCl, 1% Triton X-100, 1%  
659 sodium deoxycholate, 0.1%SDS, and 50 mM Tris at pH 7.5) supplemented with protease and  
660 phosphatase inhibitors on ice for 15 min and centrifuged at 12,000 rpm at 4 °C for 10 min.

661 Protein samples were separated by SDS/PAGE and transferred to PVDF membranes. For the  
662 Co-IP experiments, the cells were lysed in IP lysis buffer containing 50 mM Tris (pH 7.5), 150  
663 mM NaCl, 1 mM EDTA, 10% glycerol, 1% Triton X-100, and protease and phosphatase  
664 inhibitors. Cleared cell lysates were incubated with the appropriate antibodies (1-2  $\mu$ g)  
665 overnight at 4 °C followed by 4 h incubation at 4 °C with Protein A/G agarose beads. All  
666 immune complexes bound to the Protein A/G beads were washed five times with IP lysis buffer  
667 and detached from the agarose with SDS loading buffer for immunoblot analysis. A minimum  
668 of three independent experiments were performed.

### 669 **Immunofluorescence staining**

670 Cells were grown on coverslips. After transfection, the cells were fixed with 4%  
671 paraformaldehyde, permeabilized for 5 min at room temperature with PBS containing 0.25%  
672 Triton X-100, and blocked with 3% bovine serum albumin in PBS. The cells were incubated  
673 with anti-Myc antibody overnight at 4 °C. Goat anti-mouse Cy3 was used as the secondary  
674 antibody. The cells were mounted in mounting medium after incubation with PBS containing  
675 DAPI. Images were acquired and viewed with use of a Leica SP8 confocal microscope (Leica  
676 Microsystems, Wetzlar, Germany).

### 677 **Generation of knockout cell lines via CRISPR/Cas9**

678 The gRNAs were designed in CRISPR V2 (<http://zifit.partners.org>). The sequence (5'-  
679 CGCGTCGTGCTGCCCGTAT-3') in the first exon was chosen as the CRISPR targeting site  
680 for *VHL* in the human cell line. The *ARNT* target sequence in the sixth exon was 5'-  
681 TGAAATTGAACGGCGGCGA-3'. For CRISPR knockout, cells were transfected with  
682 plasmids expressing indicated gRNA and Cas9 and selected by antibiotics.

### 683 **Quantitative real-time RT-PCR**

684 Total RNA was isolated from cultured cells using TRIzol reagent (Invitrogen, Carlsbad, CA,  
685 USA). The cDNAs were reverse-transcribed into first-strand cDNA using Oligo(dT)<sub>18</sub> and M-  
686 MLV according to the manufacturer's instructions. Quantitative real-time RT-PCR (qRT-PCR)  
687 was performed using an iCycler iQ Multicolor Real-time PCR Detection System (Bio-Rad  
688 Laboratories, Hercules, CA, USA). Primer sequences used for the PCR experiments were as  
689 reported previously (Zhang *et al.*, 2020). Samples from three independent experiments were  
690 collected, and each sample was measured in duplicate. The mRNA levels of the genes of interest  
691 were calculated using the  $2^{-\Delta\Delta C_t}$  method and normalized to  $\beta$ -actin.

### 692 **Microinjection**

693 The capped mRNAs were generated *in vitro* with the mMACHINE Kit  
694 (Ambion, Austin, TX, USA). Diluted mRNA was injected into 1-2 cell stage zebrafish embryos.  
695 The protein expression of GFP in zebrafish embryos was detected at 6 hpf.

### 696 **Whole-mount *in situ* hybridization and immunohistochemical staining**

697 Whole-mount *in situ* hybridization using a digoxigenin-labeled RNA riboprobe was  
698 performed as reported previously (Feng *et al.*, 2012). Stained embryos or live embryos were  
699 mounted in glycerol or 5% methylcellulose, respectively. Images were taken using a Leica  
700 M205 FCA microscope. Image area analysis of the left of the *kctd12.1* measurement was  
701 performed with Image J software.

702 Antibody staining was performed according to standard procedures (Turner *et al.*, 2014).  
703 Embryos were fixed with formaldehyde at the indicated time points and washed with PBST  
704 with 0.8% Triton X-100 in PBS added. Embryos at 36-48 hpf were digested with proteinase K



705 for 30 min and then fixed with formaldehyde for 20 min. After being blocked for at least 1 h,  
706 embryos were incubated in the primary antibody in 4 °C overnight. After being washed  
707 sufficiently with PBST, embryos were incubated in the second antibody in 4 °C overnight. After  
708 being washed, the nuclei stained with DAPI.

### 709 **Confocal microscopy and image analysis**

710 Confocal imaging was performed on a Leica TCS SP8 STED microscope. The *Tg(huc:GFP)*  
711 embryos or whole mount immunohistochemical stained embryos were mounted in 1.2% low-  
712 melt agarose in glass-bottom dishes. Images were acquired with a 40× water objective. To count  
713 dHb neurons, we used the transgenic lines *Tg(huc:GFP)* in combination with nuclear DAPI  
714 staining. Left and right HuC:GFP+ neurons were counted using Image J from confocal stacks  
715 acquired every 2 μm.

### 716 **Statistical analysis**

717 Graphs were plotted with GraphPad Prism 7 Software (GraphPad Software, La Jolla, CA,  
718 USA). Statistical analyses were performed using a two-tailed, unpaired Student's *t*-test for  
719 comparisons between two groups or one-way ANOVA analysis of variance followed by Tukey's  
720 Bonferroni's and Dunnett's post-hoc test was used for comparisons among multiple groups or  
721 Two-way ANOVA analysis of variance followed by Bonferroni's post-hoc test was used for two  
722 independent variables affect a dependent variable.  $p < 0.05$  or smaller  $p$  value was considered  
723 statistically significant. Unless otherwise indicated, all experiments were performed in triplicate,  
724 and the data were reported as means ± S.D. for three experiments.

### 725 **Acknowledgements**

726 We are grateful to Dr. Wuhan Xiao from Institute of Hydrobiology, Chinese Academy of  
727 Sciences for providing the *vhl* mutant zebrafish. We are grateful to Dr. Matthias Carl from  
728 Department of Cellular, Computational and Integrative Biology (CIBIO), University of Trento,  
729 for providing advice on distinguishing the habenular regions.

### 730 **Financial disclosure**

731 This work was supported by the National Key R & D Program of China (2018YFA0801000  
732 to JZ), the National Natural Science Foundation of China-Shandong Joint Fund (U1606403 to  
733 JZ), the Fundamental Research Funds for the Central Universities (201822023 to JZ,  
734 201762022 to XR), the National Natural Science Foundation of China (31601863 to XR,  
735 32170834 to JZ, 31872189 to JZ, and 30972238 to JZ), and the Natural Science Foundation of  
736 Shandong Province (ZR2017MC001 to JZ). The funders had no role in the study design, data  
737 collection and analysis, decision to publish, or preparation of the manuscript.

738

### 739 **Reference**

740 Anastas, J.N., and Moon, R.T. (2013). WNT signalling pathways as therapeutic targets in cancer. *Nat*  
741 *Rev Cancer* 13, 11-26. 10.1038/nrc3419.

742 Beretta, C.A., Dross, N., Bankhead, P., and Carl, M. (2013). The ventral habenulae of zebrafish  
743 develop in prosomere 2 dependent on Tcf712 function. *Neural Dev* 8, 19. 10.1186/1749-8104-8-19.

744 Berndt, J.D., Moon, R.T., and Major, M.B. (2009). Beta-catenin gets jaded and von Hippel-Lindau is  
745 to blame. *Trends Biochem Sci* 34, 101-104. 10.1016/j.tibs.2008.12.002.

746 Cadigan, K.M., and Waterman, M.L. (2012). TCF/LEFs and Wnt signaling in the nucleus. *Cold Spring*  
747 *Harb Perspect Biol* 4. 10.1101/cshperspect.a007906.

748 Carl, M., Bianco, I.H., Bajoghli, B., Aghaallaei, N., Czerny, T., and Wilson, S.W. (2007).

- 749 Wnt/Axin1/beta-catenin signaling regulates asymmetric nodal activation, elaboration, and concordance  
750 of CNS asymmetries. *Neuron* 55, 393-405. 10.1016/j.neuron.2007.07.007.
- 751 Chitalia, V.C., Foy, R.L., Bachschmid, M.M., Zeng, L., Panchenko, M.V., Zhou, M.I., Bharti, A.,  
752 Seldin, D.C., Lecker, S.H., Dominguez, I., and Cohen, H.T. (2008). Jade-1 inhibits Wnt signalling by  
753 ubiquitylating beta-catenin and mediates Wnt pathway inhibition by pVHL. *Nat Cell Biol* 10, 1208-1216.  
754 10.1038/ncb1781.
- 755 Clevers, H., Loh, K.M., and Nusse, R. (2014). Stem cell signaling. An integral program for tissue  
756 renewal and regeneration: Wnt signaling and stem cell control. *Science* 346, 1248012.  
757 10.1126/science.1248012.
- 758 Clevers, H., and Nusse, R. (2012). Wnt/beta-catenin signaling and disease. *Cell* 149, 1192-1205.  
759 10.1016/j.cell.2012.05.012.
- 760 Cole, M.F., Johnstone, S.E., Newman, J.J., Kagey, M.H., and Young, R.A. (2008). Tcf3 is an integral  
761 component of the core regulatory circuitry of embryonic stem cells. *Genes Dev* 22, 746-755.  
762 10.1101/gad.1642408.
- 763 Concha, M.L., and Wilson, S.W. (2001). Asymmetry in the epithalamus of vertebrates. *J Anat* 199, 63-  
764 84. 10.1046/j.1469-7580.2001.19910063.x.
- 765 Doumpas, N., Lampart, F., Robinson, M.D., Lentini, A., Nestor, C.E., Cantu, C., and Basler, K. (2019).  
766 TCF/LEF dependent and independent transcriptional regulation of Wnt/beta-catenin target genes. *EMBO*  
767 *J* 38. 10.15252/embj.201798873.
- 768 Du, J., Zhang, D., Zhang, W., Ouyang, G., Wang, J., Liu, X., Li, S., Ji, W., Liu, W., and Xiao, W.  
769 (2015). pVHL Negatively Regulates Antiviral Signaling by Targeting MAVS for Proteasomal  
770 Degradation. *J Immunol* 195, 1782-1790. 10.4049/jimmunol.1500588.
- 771 Du, J., Zhang, J., He, T., Li, Y., Su, Y., Tie, F., Liu, M., Harte, P.J., and Zhu, A.J. (2016). Stuxnet  
772 Facilitates the Degradation of Polycomb Protein during Development. *Dev Cell* 37, 507-519.  
773 10.1016/j.devcel.2016.05.013.
- 774 Duan, D.R., Pause, A., Burgess, W.H., Aso, T., Chen, D.Y., Garrett, K.P., Conaway, R.C., Conaway,  
775 J.W., Linehan, W.M., and Klausner, R.D. (1995). Inhibition of transcription elongation by the VHL tumor  
776 suppressor protein. *Science* 269, 1402-1406. 10.1126/science.7660122.
- 777 Feng, Q., Zou, X., Lu, L., Li, Y., Liu, Y., Zhou, J., and Duan, C. (2012). The Stress-Response Gene  
778 *redd1* Regulates Dorsoventral Patterning by Antagonizing Wnt/beta-catenin Activity in Zebrafish. *Plos*  
779 *One* 7, e52674. 10.1371/journal.pone.0052674.
- 780 Gao, C., Cao, W., Bao, L., Zuo, W., Xie, G., Cai, T., Fu, W., Zhang, J., Wu, W., Zhang, X., and Chen,  
781 Y.G. (2010). Autophagy negatively regulates Wnt signalling by promoting Dishevelled degradation. *Nat*  
782 *Cell Biol* 12, 781-790. 10.1038/ncb2082.
- 783 Giles, R.H., Lolkema, M.P., Snijckers, C.M., Belderbos, M., van der Groep, P., Mans, D.A., van Beest,  
784 M., van Noort, M., Goldschmeding, R., van Diest, P.J., et al. (2006). Interplay between VHL/HIF1alpha  
785 and Wnt/beta-catenin pathways during colorectal tumorigenesis. *Oncogene* 25, 3065-3070.  
786 10.1038/sj.onc.1209330.
- 787 Gnarr, J.R., Ward, J.M., Porter, F.D., Wagner, J.R., Devor, D.E., Grinberg, A., Emmert-Buck, M.R.,  
788 Westphal, H., Klausner, R.D., and Linehan, W.M. (1997). Defective placental vasculogenesis causes  
789 embryonic lethality in VHL-deficient mice. *Proc Natl Acad Sci U S A* 94, 9102-9107.  
790 10.1073/pnas.94.17.9102.
- 791 Goentoro, L., and Kirschner, M.W. (2009). Evidence that fold-change, and not absolute level, of beta-  
792 catenin dictates Wnt signaling. *Mol Cell* 36, 872-884. 10.1016/j.molcel.2009.11.017.

- 793 Gossage, L., Eisen, T., and Maher, E.R. (2015). VHL, the story of a tumour suppressor gene. *Nat Rev*  
794 *Cancer* *15*, 55-64. 10.1038/nrc3844.
- 795 Guglielmi, L., Buhler, A., Moro, E., Argenton, F., Poggi, L., and Carl, M. (2020). Temporal control of  
796 Wnt signaling is required for habenular neuron diversity and brain asymmetry. *Development* *147*.  
797 10.1242/dev.182865.
- 798 Guo, J., Chakraborty, A.A., Liu, P., Gan, W., Zheng, X., Inuzuka, H., Wang, B., Zhang, J., Zhang, L.,  
799 Yuan, M., et al. (2016). pVHL suppresses kinase activity of Akt in a proline-hydroxylation-dependent  
800 manner. *Science* *353*, 929-932. 10.1126/science.aad5755.
- 801 Hiyama, H., Yokoi, M., Masutani, C., Sugawara, K., Maekawa, T., Tanaka, K., Hoeijmakers, J.H., and  
802 Hanaoka, F. (1999). Interaction of hHR23 with S5a. The ubiquitin-like domain of hHR23 mediates  
803 interaction with S5a subunit of 26 S proteasome. *J Biol Chem* *274*, 28019-28025.  
804 10.1074/jbc.274.39.28019.
- 805 Husken, U., and Carl, M. (2013). The Wnt/beta-catenin signaling pathway establishes  
806 neuroanatomical asymmetries and their laterality. *Mech Dev* *130*, 330-335. 10.1016/j.mod.2012.09.002.
- 807 Husken, U., Stickney, H.L., Gestri, G., Bianco, I.H., Faro, A., Young, R.M., Roussigne, M., Hawkins,  
808 T.A., Beretta, C.A., Brinkmann, I., et al. (2014). Tcf7l2 is required for left-right asymmetric  
809 differentiation of habenular neurons. *Curr Biol* *24*, 2217-2227. 10.1016/j.cub.2014.08.006.
- 810 Ishitani, T., Matsumoto, K., Chitnis, A.B., and Itoh, M. (2005). Nrarp functions to modulate neural-  
811 crest-cell differentiation by regulating LEF1 protein stability. *Nat Cell Biol* *7*, 1106-1112.  
812 10.1038/ncb1311.
- 813 Ivan, M., Kondo, K., Yang, H., Kim, W., Valiando, J., Ohh, M., Salic, A., Asara, J.M., Lane, W.S., and  
814 Kaelin, W.G., Jr. (2001). HIF $\alpha$  targeted for VHL-mediated destruction by proline hydroxylation:  
815 implications for O<sub>2</sub> sensing. *Science* *292*, 464-468. 10.1126/science.1059817.
- 816 Iwai, K., Yamanaka, K., Kamura, T., Minato, N., Conaway, R.C., Conaway, J.W., Klausner, R.D., and  
817 Pause, A. (1999). Identification of the von Hippel-lindau tumor-suppressor protein as part of an active  
818 E3 ubiquitin ligase complex. *Proc Natl Acad Sci U S A* *96*, 12436-12441. 10.1073/pnas.96.22.12436.
- 819 Jaakkola, P., Mole, D.R., Tian, Y.M., Wilson, M.I., Gielbert, J., Gaskell, S.J., von Kriegsheim, A.,  
820 Hebestreit, H.F., Mukherji, M., Schofield, C.J., et al. (2001). Targeting of HIF- $\alpha$  to the von Hippel-  
821 Lindau ubiquitylation complex by O<sub>2</sub>-regulated prolyl hydroxylation. *Science* *292*, 468-472.  
822 10.1126/science.1059796.
- 823 Kaelin, W.G. (2007). Von Hippel-Lindau disease. *Annu Rev Pathol* *2*, 145-173.  
824 10.1146/annurev.pathol.2.010506.092049.
- 825 Kaidi, A., Williams, A.C., and Paraskeva, C. (2007). Interaction between beta-catenin and HIF-1  
826 promotes cellular adaptation to hypoxia. *Nat Cell Biol* *9*, 210-217. 10.1038/ncb1534.
- 827 Kim, C.H., Oda, T., Itoh, M., Jiang, D., Artinger, K.B., Chandrasekharappa, S.C., Driever, W., and  
828 Chitnis, A.B. (2000). Repressor activity of Headless/Tcf3 is essential for vertebrate head formation.  
829 *Nature* *407*, 913-916. 10.1038/35038097.
- 830 Kimmel, C.B., Ballard, W.W., Kimmel, S.R., Ullmann, B., and Schilling, T.F. (1995). Stages of  
831 embryonic development of the zebrafish. *Dev Dyn* *203*, 253-310. 10.1002/aja.1002030302.
- 832 Kuan, Y.S., Roberson, S., Akitake, C.M., Fortunato, L., Gamse, J., Moens, C., and Halpern, M.E. (2015).  
833 Distinct requirements for Wntless in habenular development. *Dev Biol* *406*, 117-128.  
834 10.1016/j.ydbio.2015.06.006.
- 835 Li, V.S.W., Ng, S.S., Boersema, P.J., Low, T.Y., Karthaus, W.R., Gerlach, J.P., Mohammed, S., Heck,  
836 A.J.R., Maurice, M.M., Mahmoudi, T., and Clevers, H. (2012). Wnt Signaling through Inhibition of beta-

- 837 Catenin Degradation in an Intact Axin1 Complex. *Cell* *149*, 1245-1256. 10.1016/j.cell.2012.05.002.
- 838 Lin, X.Y., and Xu, X.L. (2009). Distinct functions of Wnt/beta-catenin signaling in KV development  
839 and cardiac asymmetry. *Development* *136*, 207-217. 10.1242/dev.029561.
- 840 MacDonald, B.T., Tamai, K., and He, X. (2009). Wnt/beta-catenin signaling: components,  
841 mechanisms, and diseases. *Dev Cell* *17*, 9-26. 10.1016/j.devcel.2009.06.016.
- 842 Mazumdar, J., O'Brien, W.T., Johnson, R.S., LaManna, J.C., Chavez, J.C., Klein, P.S., and Simon,  
843 M.C. (2010). O2 regulates stem cells through Wnt/beta-catenin signalling. *Nat Cell Biol* *12*, 1007-1013.  
844 10.1038/ncb2102.
- 845 Merrill, B.J., Pasolli, H.A., Polak, L., Rendl, M., Garcia-Garcia, M.J., Anderson, K.V., and Fuchs, E.  
846 (2004). Tcf3: a transcriptional regulator of axis induction in the early embryo. *Development* *131*, 263-  
847 274. 10.1242/dev.00935.
- 848 Nusse, R., and Clevers, H. (2017). Wnt/beta-Catenin Signaling, Disease, and Emerging Therapeutic  
849 Modalities. *Cell* *169*, 985-999. 10.1016/j.cell.2017.05.016.
- 850 Ohh, M., Yauch, R.L., Lonergan, K.M., Whaley, J.M., Stemmer-Rachamimov, A.O., Louis, D.N.,  
851 Gavin, B.J., Kley, N., Kaelin, W.G., Jr., and Iliopoulos, O. (1998). The von Hippel-Lindau tumor  
852 suppressor protein is required for proper assembly of an extracellular fibronectin matrix. *Mol Cell* *1*,  
853 959-968. 10.1016/s1097-2765(00)80096-9.
- 854 Petersen, C.P., and Reddien, P.W. (2009). Wnt signaling and the polarity of the primary body axis.  
855 *Cell* *139*, 1056-1068. 10.1016/j.cell.2009.11.035.
- 856 Phillips, B.T., and Kimble, J. (2009). A new look at TCF and beta-catenin through the lens of a  
857 divergent *C. elegans* Wnt pathway. *Dev Cell* *17*, 27-34. 10.1016/j.devcel.2009.07.002.
- 858 Saini, S., Majid, S., and Dahiya, R. (2011). The complex roles of Wnt antagonists in RCC. *Nat Rev*  
859 *Urol* *8*, 690-699. 10.1038/nrrol.2011.146.
- 860 Sakata, E., Yamaguchi, Y., Kurimoto, E., Kikuchi, J., Yokoyama, S., Yamada, S., Kawahara, H.,  
861 Yokosawa, H., Hattori, N., Mizuno, Y., et al. (2003). Parkin binds the Rpn10 subunit of 26S proteasomes  
862 through its ubiquitin-like domain. *EMBO Rep* *4*, 301-306. 10.1038/sj.embor.embor764.
- 863 Shy, B.R., Wu, C.I., Khramtsova, G.F., Zhang, J.Y., Olopade, O.I., Goss, K.H., and Merrill, B.J. (2013).  
864 Regulation of Tcf7l1 DNA binding and protein stability as principal mechanisms of Wnt/beta-catenin  
865 signaling. *Cell Rep* *4*, 1-9. 10.1016/j.celrep.2013.06.001.
- 866 Stamos, J.L., and Weis, W.I. (2013). The beta-catenin destruction complex. *Cold Spring Harb Perspect*  
867 *Biol* *5*, a007898. 10.1101/cshperspect.a007898.
- 868 Steinhart, Z., and Angers, S. (2018). Wnt signaling in development and tissue homeostasis.  
869 *Development* *145*. 10.1242/dev.146589.
- 870 Turner, K.J., Bracewell, T.G., and Hawkins, T.A. (2014). Anatomical dissection of zebrafish brain  
871 development. *Methods Mol Biol* *1082*, 197-214. 10.1007/978-1-62703-655-9\_14.
- 872 Upadhyaya, S.C., and Hegde, A.N. (2003). A potential proteasome-interacting motif within the  
873 ubiquitin-like domain of parkin and other proteins. *Trends Biochem Sci* *28*, 280-283. 10.1016/S0968-  
874 0004(03)00092-6.
- 875 van Rooijen, E., Voest, E.E., Logister, I., Korving, J., Schwerte, T., Schulte-Merker, S., Giles, R.H.,  
876 and van Eeden, F.J. (2009). Zebrafish mutants in the von Hippel-Lindau tumor suppressor display a  
877 hypoxic response and recapitulate key aspects of Chuvash polycythemia. *Blood* *113*, 6449-6460.  
878 10.1182/blood-2008-07-167890.
- 879 Wu, D., Potluri, N., Lu, J., Kim, Y., and Rastinejad, F. (2015). Structural integration in hypoxia-  
880 inducible factors. *Nature* *524*, 303-308. 10.1038/nature14883.

881 Yamada, M., Ohnishi, J., Ohkawara, B., Iemura, S., Satoh, K., Hyodo-Miura, J., Kawachi, K.,  
882 Natsume, T., and Shibuya, H. (2006). NARF, an nemo-like kinase (NLK)-associated ring finger protein  
883 regulates the ubiquitylation and degradation of T cell factor/lymphoid enhancer factor (TCF/LEF). *J Biol*  
884 *Chem* 281, 20749-20760. 10.1074/jbc.M602089200.

885 Yi, F., Pereira, L., Hoffman, J.A., Shy, B.R., Yuen, C.M., Liu, D.R., and Merrill, B.J. (2011). Opposing  
886 effects of Tcf3 and Tcf1 control Wnt stimulation of embryonic stem cell self-renewal. *Nat Cell Biol* 13,  
887 762-770. 10.1038/ncb2283.

888 Zhang, H., Rong, X., Wang, C., Liu, Y., Lu, L., Li, Y., Zhao, C., and Zhou, J. (2020). VBP1 modulates  
889 Wnt/beta-catenin signaling by mediating the stability of the transcription factors TCF/LEFs. *J Biol Chem*  
890 295, 16826-16839. 10.1074/jbc.RA120.015282.

891 Zhang, J., Wu, T., Simon, J., Takada, M., Saito, R., Fan, C., Liu, X.D., Jonasch, E., Xie, L., Chen, X.,  
892 et al. (2018). VHL substrate transcription factor ZHX2 as an oncogenic driver in clear cell renal cell  
893 carcinoma. *Science* 361, 290-295. 10.1126/science.aap8411.

894 Zhang, P., Yao, Q., Lu, L., Li, Y., Chen, P.J., and Duan, C. (2014). Hypoxia-inducible factor 3 is an  
895 oxygen-dependent transcription activator and regulates a distinct transcriptional response to hypoxia.  
896 *Cell Rep* 6, 1110-1121. 10.1016/j.celrep.2014.02.011.

### 897 **Figure Legends**

898 **Figure 1 pVHL inhibits Wnt/ $\beta$ -catenin signaling and stabilizes TCF/LEF protein.** (A)  
899 TOPFlash luciferase assays in HCT116 cells with increasing pVHL overexpression. Values are  
900 mean  $\pm$  S.D. (n=3). One-way ANOVA analysis with Dunnett's multiple comparisons test, **\*\*** $p$   
901  $< 0.01$ ; **\*\*\*** $p < 0.001$ . (B) TOPFlash assays in VP16-Tcf711 $\Delta$ N-treated HEK293T cells with  
902 increasing pVHL overexpression. Wnt/ $\beta$ -catenin signal was activated by transfection with 50  
903 ng VP16-Tcf711 $\Delta$ N plasmid DNA. Expression of Flag-pVHL was confirmed by western  
904 blotting. Values are mean  $\pm$  S.D. (n=3). One-way ANOVA analysis with Dunnett's multiple  
905 comparisons test, **\*\*** $p < 0.01$ ; **\*\*\*** $p < 0.001$ ; **\*\*\*\*** $p < 0.0001$ . (C) TOPFlash luciferase assays  
906 in *VHL*-knockout HEK293T cells. pVHL protein levels were confirmed by western blotting.  
907 Values are mean  $\pm$  S.D. (n=3). Unpaired *t*-test, **\*\*** $p < 0.01$ . (D) TOPFlash luciferase assays in  
908 BIO-treated *VHL*-knockout HEK293T cells. TOPFlash plasmid was cotransfected with *Renilla*  
909 plasmid into control or *VHL*-knockout cells. Wnt/ $\beta$ -catenin activity was induced by BIO (1  $\mu$ M).  
910 Values are mean  $\pm$  S.D. (n=3). Unpaired *t*-test, **\*** $p < 0.05$ ; **\*\*** $p < 0.01$ ; **\*\*\*** $p < 0.001$ . (E, F)  
911 Exogenous Tcf/Lef protein levels in control or pVHL-overexpressing HEK293T and HCT116  
912 cells. (G) Tcf711-HMG DBD protein level in HEK293T cells with Flag-pVHL overexpression.  
913 (H) Endogenous TCF protein levels in HEK293T cells with increasing pVHL overexpression.  
914 (I) Flag-pVHL promotes Myc-Tcf712 degradation in HEK293T cells. HEK293T cells were  
915 transfected with Myc-Tcf712, co-transfected with empty vector or Flag-pVHL, after 16 h,  
916 treated with cycloheximide (CHX; 100  $\mu$ g/mL), and harvested at indicated time points. (J)  
917 Quantification of (I). Myc-Tcf712 protein level normalized to GAPDH. Values are mean  $\pm$  S.D.  
918 (n=3). Two-way ANOVA analysis with Bonferroni's multiple comparisons test, ns, not  
919 significant; **\*** $p < 0.05$ . (K) The protein levels of TCFs in control and *VHL*-Knockout cells. The  
920 expression level of HIF-1 $\alpha$  was used as a positive control. (L) The transcriptional levels of  
921 *TCFs* in control and *VHL*-knockout cells were analyzed by qRT-PCR. Values are mean  $\pm$  S.D.  
922 (n=3). Unpaired *t*-test, ns, not significant. (M) Introduction of Flag-pVHL into *VHL*-knockout  
923 HEK293T cells downregulated TCFs protein levels. (N) Reintroduction of Flag-pVHL  
924 downregulated TCF7 and TCF7L2 in 786-O cells. (O) *vhl*-deficiency upregulated Tcf712

925 protein in zebrafish embryos. Sibling and mutant embryos were harvested at 120 hpf. Protein  
926 samples of 4 zebrafish embryos were added in each well.

927 **Figure 2 pVHL directly binds with TCF/LEFs and promotes their degradation by**  
928 **ubiquitin-independent proteasome pathway.** (A) Detection of pVHL binding to TCF/LEFs  
929 in HEK293T cells by Co-IP. Red asterisk indicates the specific band. (B) Co-IP assay revealed  
930 the endogenous interaction between TCF7L2 and pVHL in HEK293T cells. IgG heavy chain  
931 was used as a negative control. (C, D) pVHL directly binds with TCF/LEFs. Purified GST or  
932 GST-pVHL proteins were incubated with extracts of HEK293T cells either transfected with  
933 Myc-Tcf/Lefs (C) or untransfected (D). Bound proteins were eluted and analyzed by western  
934 blot using indicated antibodies. (E) Tcf7l2 and Tcf7l1-HMG DBD protein levels in HEK293T  
935 cells with pVHL- or pVHL-S111C/H115N/W117R-overexpression. (F) pVHL promoted Tcf7l2  
936 degradation in presence of the DMOG. Western blot analysis of WCL derived from HEK293T  
937 cells transfected with indicated plasmid DNA and either untreated or treated with 200  $\mu$ M  
938 DMOG for 12 h. (G) Time-course for non-phospho-(active)  $\beta$ -catenin,  $\beta$ -catenin, and TCF7L2  
939 protein levels in starved HEK293T cells. Western blot analysis of WCL derived from starved  
940 HEK293T cells at indicated time points. (H, I) Endogenous TCF7, TCF7L1, TCF7L2, and HIF-  
941 1 $\alpha$  protein level under normoxia (21% O<sub>2</sub>) or hypoxia (1% O<sub>2</sub>) condition for 24 h in wild-type  
942 (H) and in *HIF-1 $\beta$* -knockout HEK293T cells (I). (J) Changes in Tcf7l2 protein levels in pVHL-  
943 overexpressing HEK293T cells treated with indicated inhibitors. The transfected cells were  
944 either untreated or treated with 10  $\mu$ M MG132, 25 mM NH<sub>4</sub>Cl, or 5 mM 3-MA for 8 h. (K)  
945 Effects of pVHL-overexpression on Tcf7l2 ubiquitination. Myc-Tcf7l2, Flag-HIF-1 $\alpha$ , and HA-  
946 Ub were co-transfected with GFP-Vector or pVHL-GFP into HEK293T cells. After 48h, cells  
947 were treated with 10  $\mu$ M MG132 for 8 h, and lysed for immunoprecipitation with anti-Myc and  
948 anti-Flag antibody. Immunoprecipitates were detected by anti-Myc, anti-Flag, or anti-HA  
949 antibody. WCL were analyzed with anti-Myc, anti-GFP, or anti-Flag antibody. (L) Changes in  
950 Tcf7l2-K/R protein levels in pVHL-overexpressing HEK293T cells treated with indicated  
951 inhibitors. Western blot analysis of WCL derived from HEK293T cells transfected with  
952 indicated plasmid DNA and either untreated or treated with 10  $\mu$ M MG132, 25 mM NH<sub>4</sub>Cl, or  
953 5 mM 3-MA for 8 h.

954 **Figure 3 pVHL promotes TCF/LEF degradation in an E3 ubiquitin ligase-independent**  
955 **manner.** (A) Tcf7l2 protein levels in HEK293T cells with overexpression of wild-type, site-  
956 mutated, or truncated pVHL. (B) TOPFlash reporter assays in VP16-Tcf7l1 $\Delta$ N-transfected  
957 HEK293T cells with overexpression of wild-type, site-mutated, or truncated pVHL. Wnt/ $\beta$ -  
958 catenin signal was activated by transfection with 50 ng VP16-Tcf7l1 $\Delta$ N. Values are mean  $\pm$   
959 S.D. (n=3). Unpaired *t*-test. \**p* < 0.05; \*\**p* < 0.01; \*\*\**p* < 0.001. (C) Tcf7l1-HMG DBD protein  
960 levels in HEK293T cells with overexpression of wild-type, site-mutated, or truncated pVHL.  
961 (D) Tcf7l2-K/R protein levels in HEK293T cells with overexpression of wild-type, site-mutated,  
962 or truncated pVHL. (E) pVHL truncation mutant pVHL(1-157) promotes Tcf7l2 degradation in  
963 HEK293T cells. HEK293T cells were transfected with Myc-Tcf7l2, along with either empty  
964 vector or Flag-pVHL(1-157), after 16 h, treated with cycloheximide (CHX; 100  $\mu$ g/mL) and  
965 harvested at indicated time points. (F) Quantification of (E). Myc-Tcf7l2 protein level  
966 normalized to GAPDH. Values are mean  $\pm$  S.D. (n=3). Two-way ANOVA analysis with  
967 Bonferroni's multiple comparisons test. ns, not significant; \**p* < 0.05. (G) Overexpression of  
968 Flag-pVHL and Flag-pVHL(1-157) reduced TCF7, TCF7L1, and TCF7L2 protein levels in

969 *VHL*-KO cells. HIF-1 $\alpha$  was downregulated in *VHL*-KO after transfection with Flag-pVHL but  
970 not with Flag-pVHL(1-157). (H) GFP expression in zebrafish embryos injected with pVHL or  
971 pVHL(1-157) with self-cleaving P2A-GFP at 6 hpf. Embryos at 1-2 cell stage were injected  
972 with each indicated mRNA and raised to 6 hpf. Scale bar = 200  $\mu$ m. (I) Overexpression of  
973 pVHL or pVHL(1-157) decreased Tcf7l2 protein level in wide-type zebrafish embryos at 24  
974 hpf. Protein samples of 4 zebrafish embryos were added in each well. (J) Reintroduction of  
975 pVHL or pVHL(1-157) into *vhl*-null mutant zebrafish embryos reduced Tcf7l2 protein level at  
976 48 hpf. Protein samples of 4 zebrafish embryos were added in each well.

977 **Figure 4 pVHL (54-157) is necessary and sufficient to promote TCF/LEF protein**  
978 **degradation.** (A) Schematic representations of pVHL wild-type and truncated mutant proteins.  
979 (B) Mapping pVHL binding domain interacting with Tcf7l2 in transfected HEK293T cells by  
980 Co-IP assay. (C) Tcf7l2 protein levels in HEK293T cells with overexpression of indicated  
981 pVHL mutants. (D) TOPFlash reporter assays in HEK293T cells with coexpression of VP16-  
982 Tcf7l1 $\Delta$ N and each indicated pVHL mutant. Wnt/ $\beta$ -catenin signal was activated by transfection  
983 with 50 ng VP16-Tcf7l1 $\Delta$ N. Expression of the indicated Flag-tagged mutant pVHL was  
984 detected by an anti-Flag antibody. Values are mean  $\pm$  S.D. (n=3). One-way ANOVA analysis  
985 with Dunnett's multiple comparisons test. ns, not significant; \* $p$  < 0.05; \*\*\*\* $p$  < 0.0001. (E)  
986 Tcf7l2-K/R protein levels in HEK293T cells with overexpression of indicated pVHL mutants.  
987 (F) Tcf7l2 protein levels in HEK293T cells with overexpression of indicated pVHL mutants.  
988 (G) TOPFlash reporter assays in HEK293T cells with coexpression of VP16-Tcf7l1 $\Delta$ N and  
989 indicated pVHL domains. Expression levels of indicated pVHL mutants detected by anti-GFP  
990 antibody. Values are mean  $\pm$  S.D. (n=3). One-way ANOVA analysis with Dunnett's multiple  
991 comparisons test. ns, not significant; \*\*  $p$  < 0.01; \*\*\* $p$  < 0.001; \*\*\*\* $p$  < 0.0001. (H)  
992 Introduction of pVHL and pVHL(54-157) into *VHL*-KO cells reduced TCF7, TCF7L1, and  
993 TCF7L2 protein levels. HIF-1 $\alpha$  was downregulated in *VHL*-KO after transfection with pVHL-  
994 GFP but not with pVHL(54-157)-GFP. (I) Illustration of TCF7L2 wild-type and truncated  
995 mutant proteins. (J) Mapping TCF7L2 binding domain interacting with pVHL in transfected  
996 HEK293T cells by Co-IP assay. Red asterisk indicates the specific band. (K) The protein levels  
997 of TCF7L2 mutants in HEK293T cells with overexpressing pVHL.

998 **Figure 5 pVHL directly interacts with 26S proteasome.** (A) *In vitro* cell-free GST pulldown  
999 assay revealed direct interaction between RPN10 and pVHL. Proteasome was incubated with  
1000 GST or GST-pVHL and pulled down by glutathione agarose. RPN10 is a critical proteasomal  
1001 subunit protein and was assessed by western blotting. Input proteins were examined by  
1002 Coomassie blue staining. Red arrow indicates GST-pVHL. (B) Co-IP assay revealed that Flag-  
1003 pVHL interacted with endogenous RPN10 in HEK293T cells. (C) *In vitro* cell-free GST  
1004 pulldown assay detected binding of full-length and mutant pVHL to proteasome. Red arrows  
1005 indicate GST-fusion protein. (D) Schematic illustration of mechanism by which TCF/LEF  
1006 protein stability is regulated by pVHL.

1007 **Figure 6 Genetic deletion of *vhl* reduces development of habenular neurons and acts**  
1008 **upstream of *tcf7l2*-null mutation.** (A) Immunostaining of Tcf7l2-expressing cells in dHb  
1009 neurons in wild-type and *vhl*-null embryos at 37 hpf. Dorsal view with anterior side upward.  
1010 Nuclei are counterstained with DAPI (blue), and the habenular region is encircled.  
1011 Maximum intensity projection of Z-stack images, which were acquired every 2  $\mu$ m. Scale bar  
1012 = 25 $\mu$ m. (B) Numbers of Tcf7l2-expressing cells in dHb neurons in (A). Values are mean  $\pm$  S.D.

1013 Unpaired *t*-test. \**p* < 0.05; \*\**p* < 0.01. (C) Habenular neurons of wild-type and *vhl*-null  
1014 embryos in *Tg (huc:GFP)* transgenic background at 48 hpf. Dorsal view with anterior side  
1015 upward. Nuclei are counterstained with DAPI (blue). Scale bar = 25 μm. (D) Numbers of left  
1016 and right lateral HuC:GFP<sup>+</sup> habenular neurons in (C). Values are mean ± S.D. Unpaired *t*-test.  
1017 \**p* < 0.05; \*\*\**p* < 0.001. (E) Expression of *kctd12.1* and *kctd8* in dorsal habenula in embryos  
1018 with indicated genotypes at 96 hpf. *kctd12.1*, which is reduced in *vhl*-null embryos, is enhanced  
1019 in *tcf7l2*-null mutants, and *kctd8*, which is less strongly reduced in *vhl*-null embryos, is absent  
1020 in *tcf7l2*-null mutants; *vhl/tcf7l2* double mutants show the same character as that of *tcf7l2*-null  
1021 mutants. Dorsal view with anterior side upward. Scale bar = 20 μm. (F) Quantification of left  
1022 lateral *kctd12.1*<sup>+</sup> habenular cells in (E). The total embryo numbers are given along the X-axis.  
1023 Values are mean ± S.D. One-way ANOVA analysis with Tukey's post-hoc test. Different letters  
1024 indicate significant differences (*p* < 0.001).

1025 **Figure 1-figure supplement 1. Generation of *VHL*-null cell lines.** (A) Schematic illustrations  
1026 of genomic structures and target positions of CRISPR/Cas9-mediated *VHL* mutation. ATG  
1027 denotes translation start codon; the black box denotes exon; purple box denotes UTR; black  
1028 lines denote introns. (B) Schematic illustrations of pVHL truncated protein structures. Two Met  
1029 denote different translation start codons in pVHL. Numbers denote amino acid positions of  
1030 critical domain and mutant protein length.

1031 **Figure 2-figure supplement 1. Generation of *HIF1-β (ARNT)*-null cell lines.** (A) Schematic  
1032 illustrations of genomic structures and target positions of CRISPR/Cas9-mediated *ARNT*  
1033 mutation. ATG denotes translation start codon; the black box denotes exon; purple box denotes  
1034 UTR; black lines denote introns. (B) Schematic illustrations of HIF1-β truncated protein  
1035 structures. Numbers denote amino acid positions of critical domain and mutant protein length.

1036 **Figure 2-figure supplement 2. TCF/LEF amino acid sequence alignment.** Amino acid  
1037 sequence alignment of human, mouse, *Xenopus*, and zebrafish TCF/LEFs. Conserved lysines  
1038 are indicated in black. Accession numbers are: human TCF7 NP\_003193.2, mouse TCF7  
1039 NP\_001300910.1, zebrafish Tcf7 NP\_001012389.1, *Xenopus* Tcf7 NP\_989421.1, human  
1040 TCF7L1 NP\_112573.1, mouse TCF7L1 NP\_001073290.1, zebrafish Tcf7l1a NP\_571344.1,  
1041 zebrafish Tcf7l1b NP\_571371.2, *Xenopus* Tcf7l1 NP\_001005640.1, human TCF7L2  
1042 NP\_001139746.1, mouse TCF7L2 NP\_001136390.1, zebrafish Tcf7l2 NP\_571334.1,  
1043 *Xenopus* Tcf7l2 NP\_001231922.1, human LEF1 NP\_057353.1, mouse LEF1 NP\_034833.2,  
1044 zebrafish Lef1 NP\_571501.1 and *Xenopus* Lef1 NP\_001230763.1.

1045 **Figure 4-figure supplement 1. Mapping the binding domains of TCF7L2 to pVHL.** (A, B)  
1046 Mapping TCF7L2 binding domain associated with pVHL in transfected HEK293T cells by Co-  
1047 IP assay. Red asterisk indicates the specific band. (C) The protein levels of TCF7L2 mutants in  
1048 HEK293T cells with overexpression of pVHL. (D) The cellular location of HA-tagged TCF7L2  
1049 mutants in HeLa cells. Scale bar = 10 μm.

1050 **Figure 6-figure supplement 1 Representative morphologies of *vhl*, *tcf7l2*, and *vhl/tcf7l2*  
1051 double mutants.** (A, D) Representative images of mutant embryos at 48 hpf (A) and 96 hpf  
1052 (D) with indicated genotypes. Scale bar = 250 μm. (B, E) Schematic illustration representing  
1053 body length measurement at 48 hpf (A) and 96 hpf (D). (C) Quantification of the body length  
1054 of a-b (mouth to end of tail through center of ear vesicle) in sibling and *vhl* mutant embryos at  
1055 48 hpf (A). Values are mean ± S.D. Unpaired *t*-test. ns, not significant. (F) Quantification of the  
1056 head length of a-b (mouth to center of ear vesicle) and trunk length of b-c (center of ear vesicle



1057 to end of tail) in sibling and *vhl* mutant embryos at 96 hpf (D). The total embryo numbers are  
1058 given along the X-axis. Values are mean  $\pm$  S.D.. Unpaired *t*-test. ns, not significant; \*\*  $p < 0.01$ .  
1059 **Figure 6-figure supplement 2. Depletion of pVhl had little effect on left-right asymmetric**  
1060 **development.** (A-G) Offspring embryos of heterozygous *vhl* mutants are examined for *cmhc2*  
1061 expression at 28 hpf (A) and 48 hpf (B), *foxa3* expression at 48 hpf (C), *cp* expression at 48 hpf  
1062 (D), *spaw* expression at the 23-somite stage (E), *lefty1/lefty2* expression at the 23-somite stage  
1063 (F), *pitx2* expression in head (left) and LPM (right) at the 23-somite stage (G). Embryos are  
1064 shown in ventral (A, B) or dorsal view (C-G) with anterior side upward. The asterisk indicates  
1065 the expression of *lefty1* in the diencephalon, and the arrow indicates the expression of *lefty2* in  
1066 heart field (F). l, liver; p, pancreas; g, gut. Scale bar = 100  $\mu$ m.

**Figure 1**

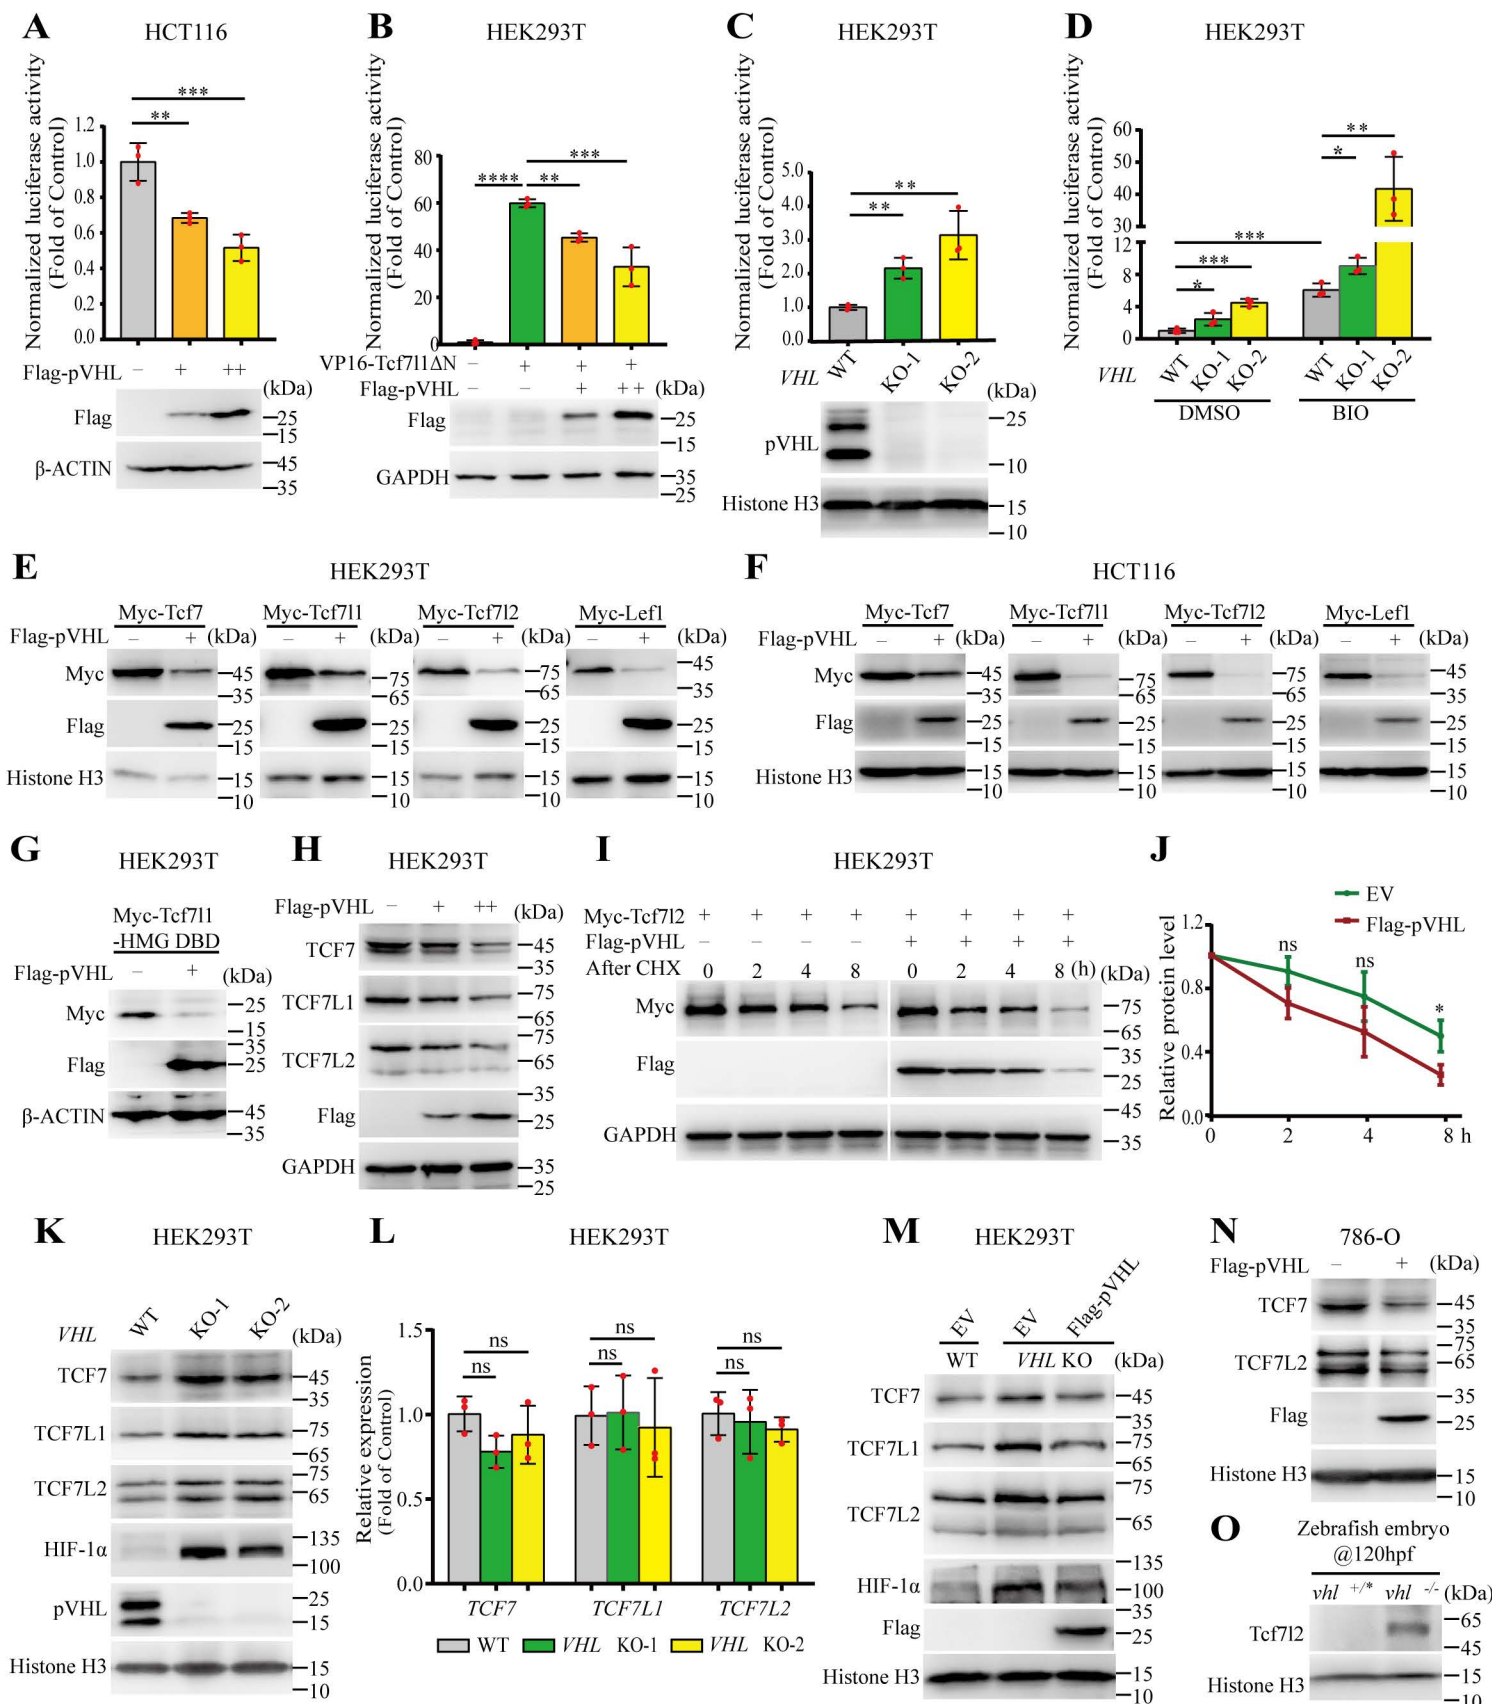

**Figure 2**

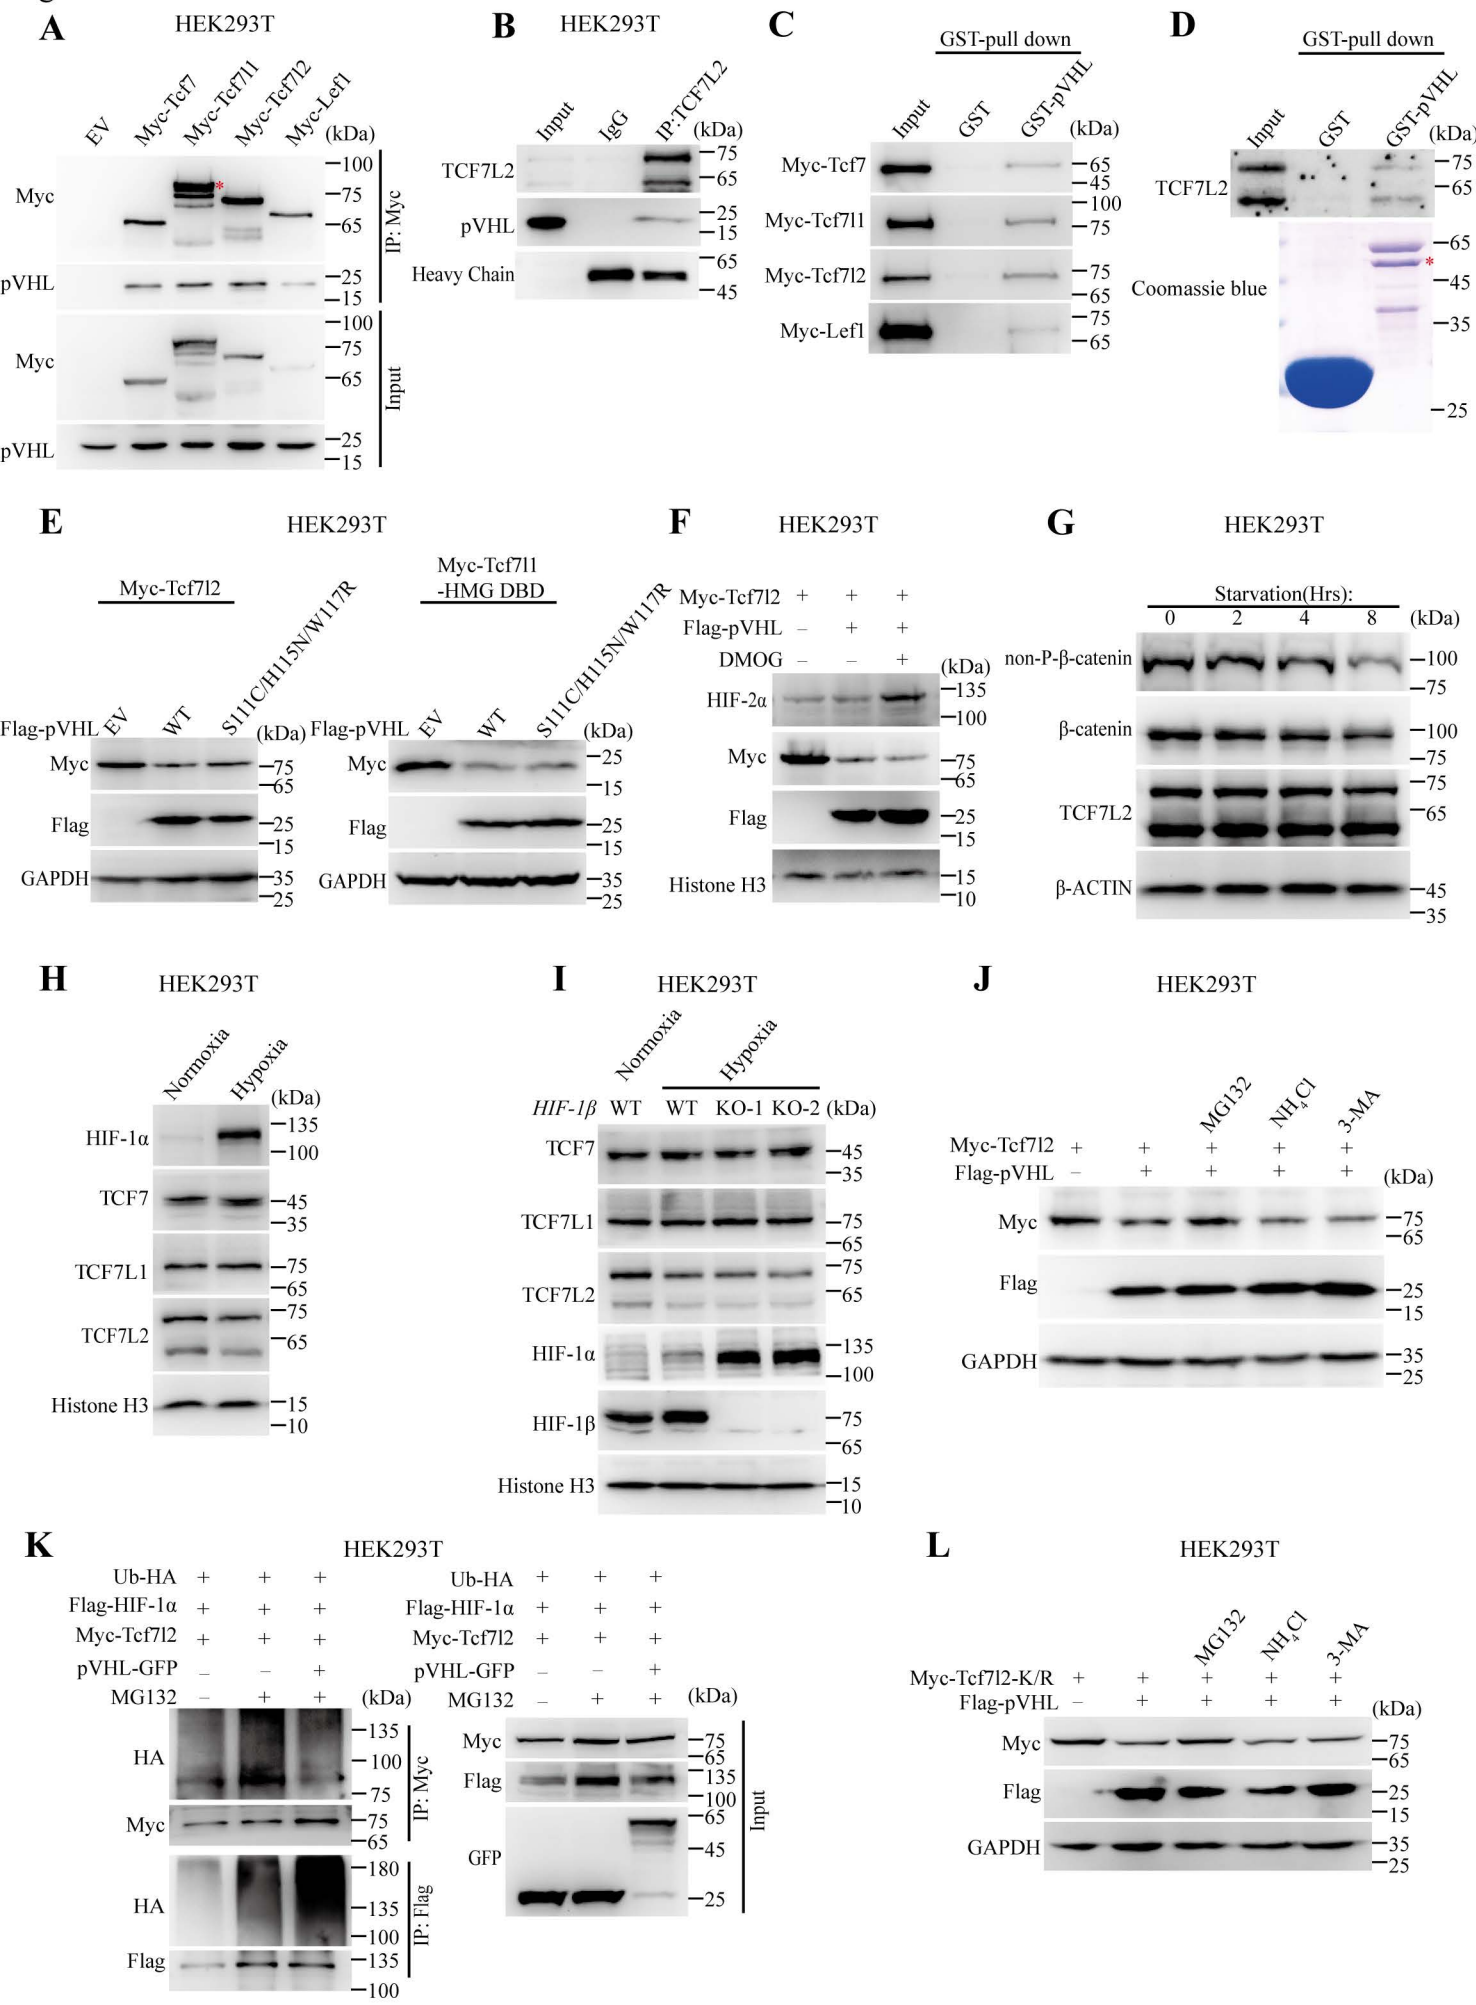

Figure 3

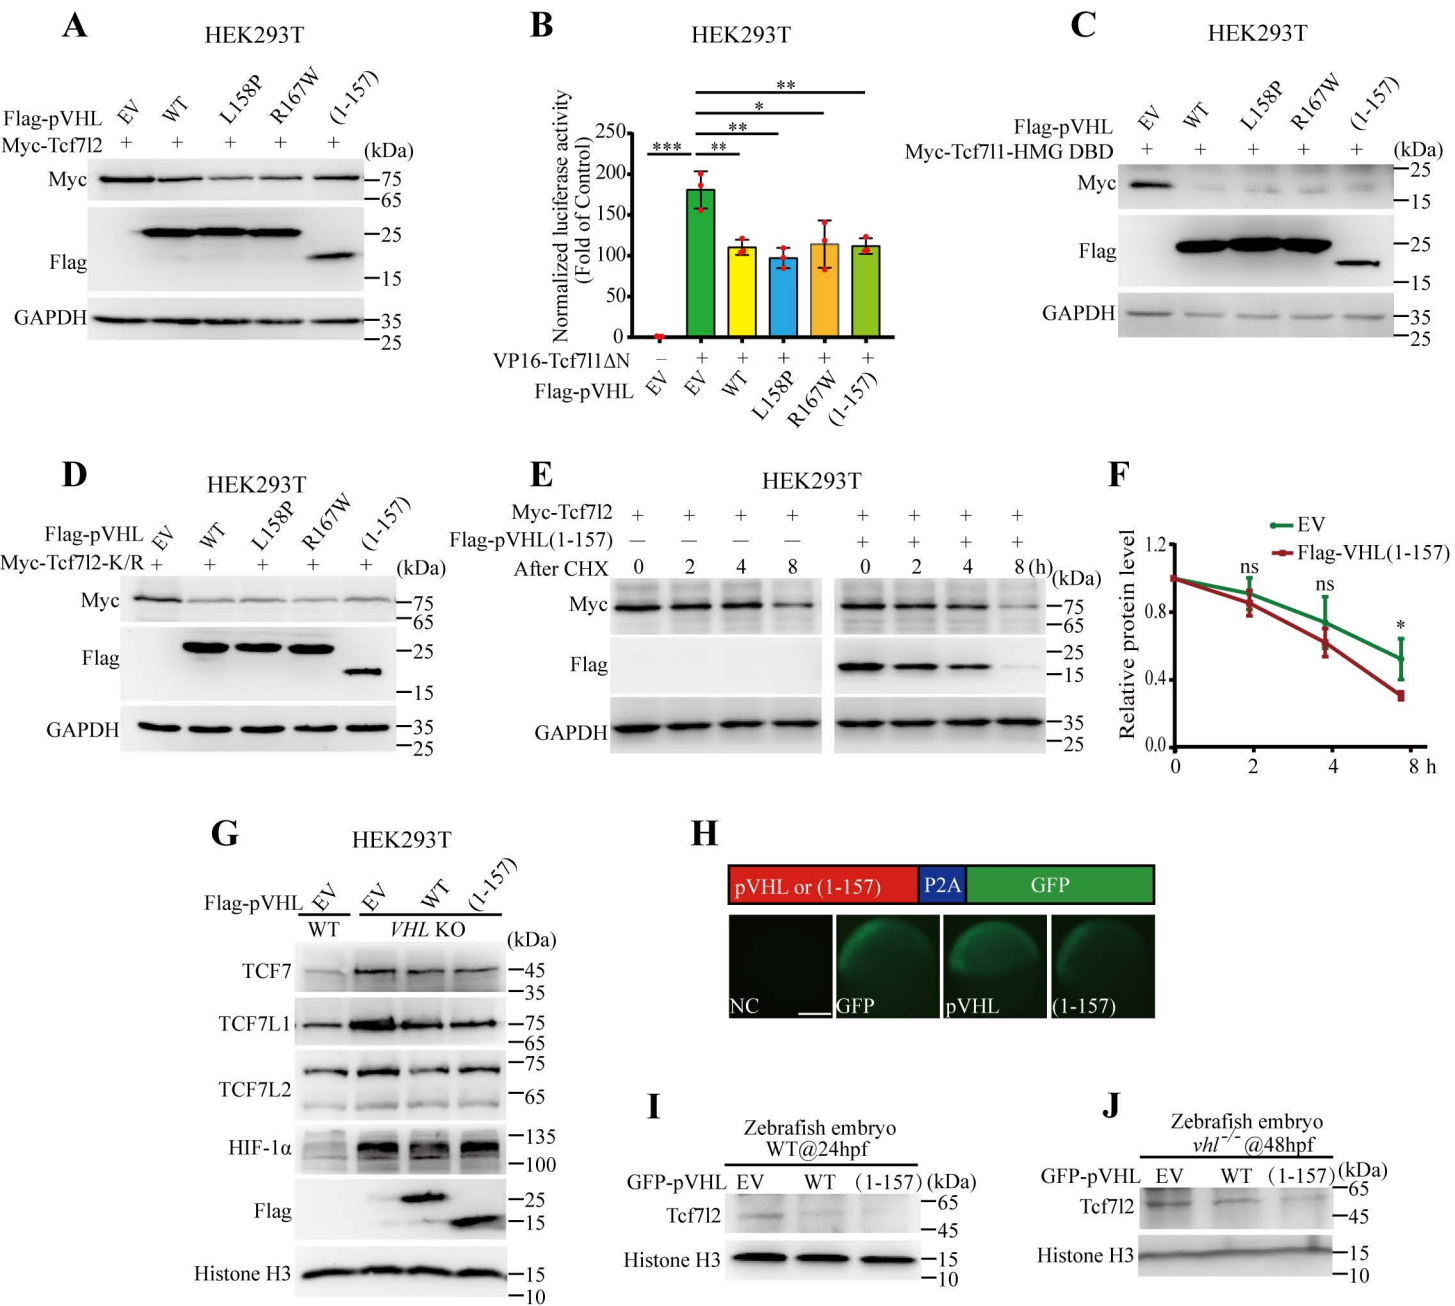

Figure 4

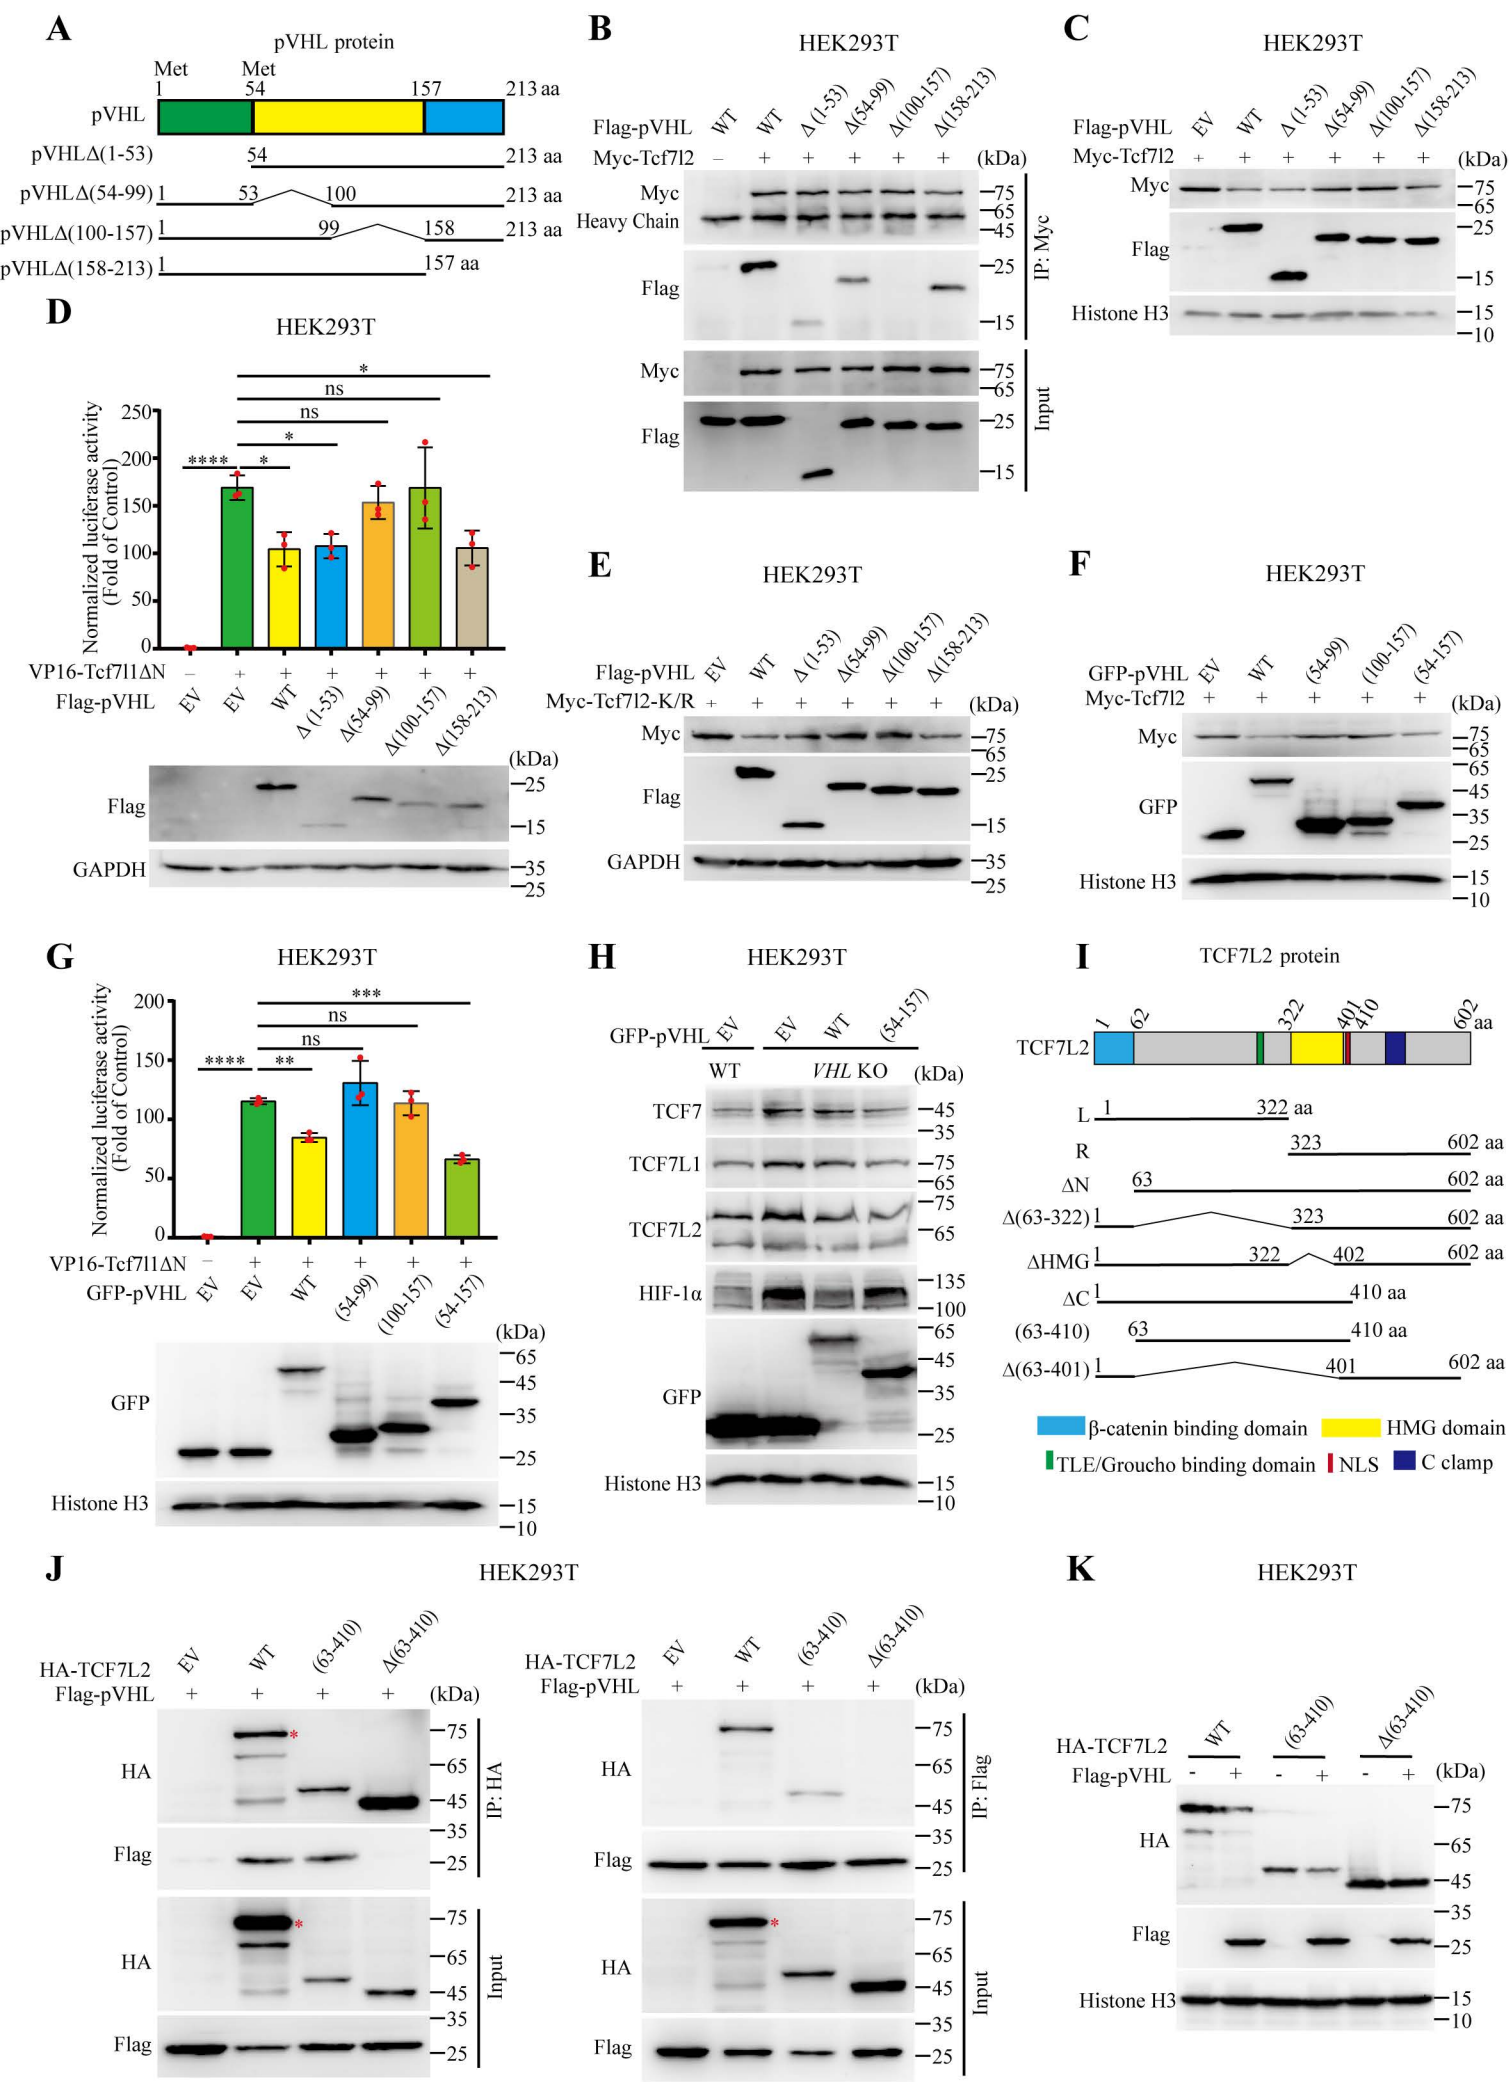

Figure 5

**A**

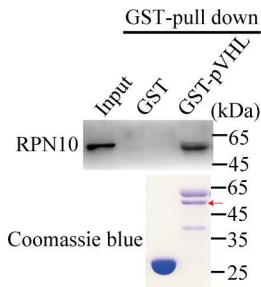

**B**

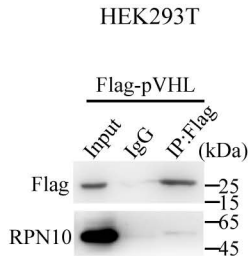

**C**

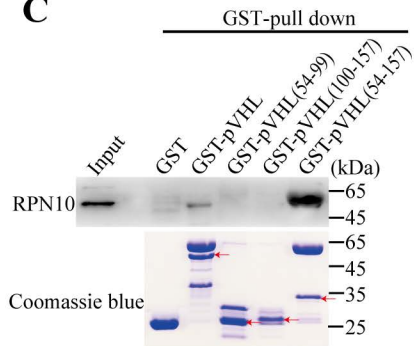

**D**

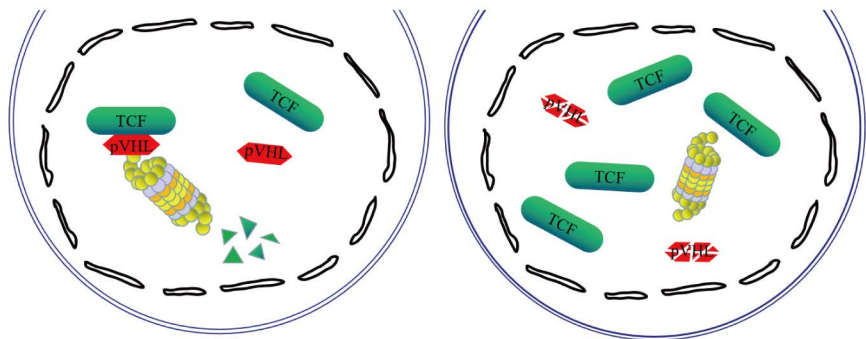

Figure 6

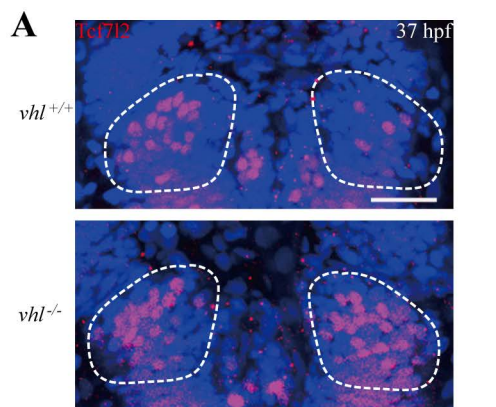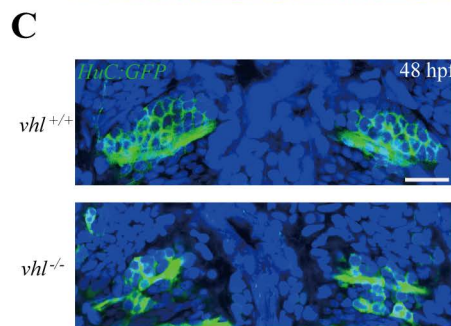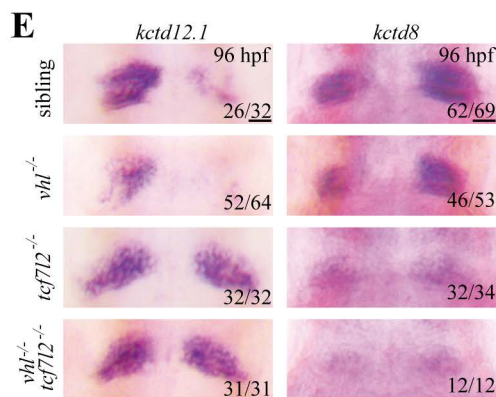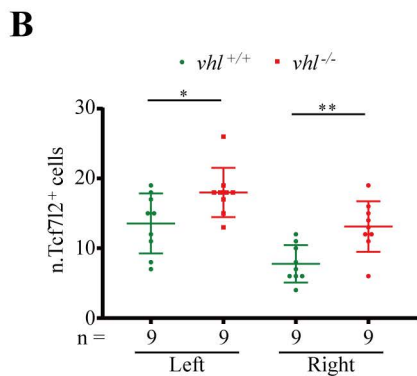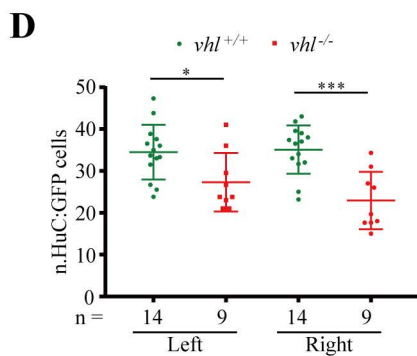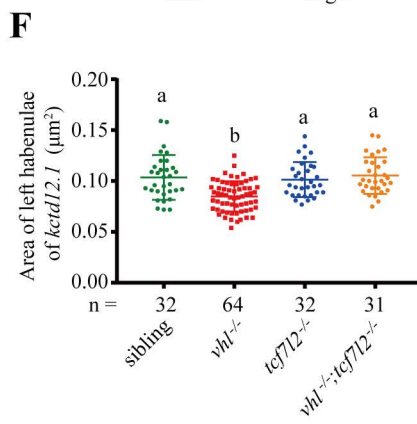

# Figure 1-figure supplement 1

## A *VHL* genome

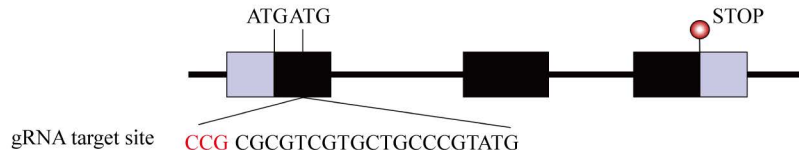

|                               |                   |                                                           |
|-------------------------------|-------------------|-----------------------------------------------------------|
|                               | <i>VHL</i> WT     | CCCTCCCAGGTCATCTTCTGCAATCGCAGTCCGCGCGTCGTGCTGCCCGTATG     |
| KO-1<br>Compound heterozygous | Allele 1 (-7 bp)  | CCCTC - - - - - ATCTTCTGCAATCGCAGTCCGCGCGTCGTGCTGCCCGTATG |
|                               | Allele 2 (-25 bp) | CCCTCCCAGGTCATCTT - - - - - CTGCCCGTATG                   |
| KO-2                          | (+1 bp)           | CCCTCCCAGGTCATCTTCTGCAATCGCAGTCCGCGCGGTCGTGCTGCCCGTATG    |

## B pVHL protein

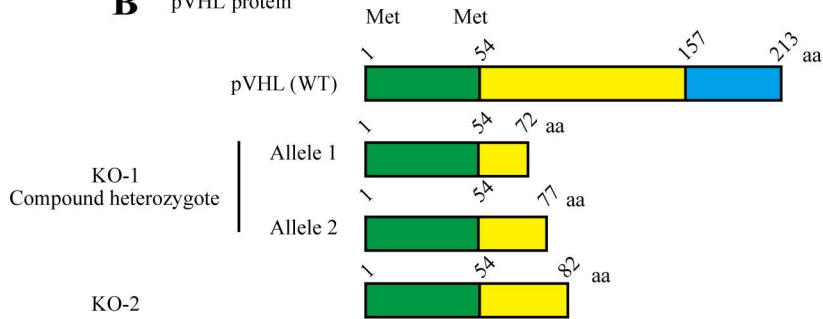



# Figure 2-figure supplement 1

## A

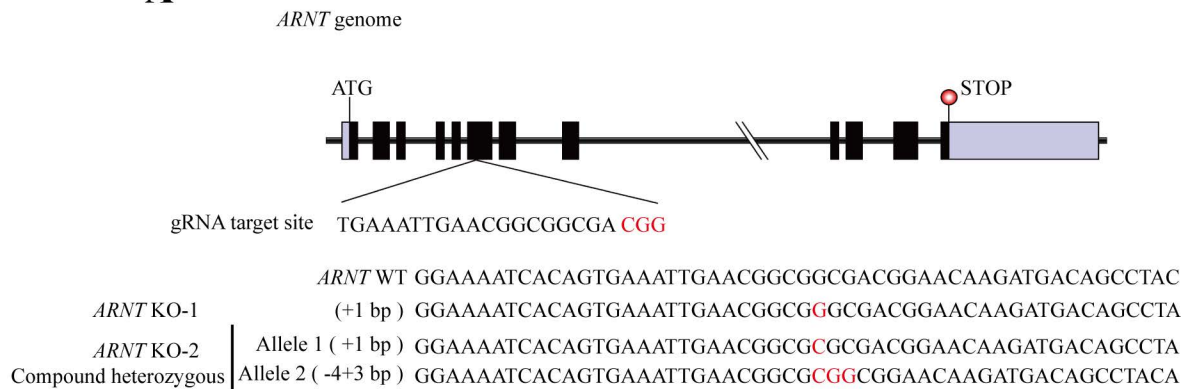

## B

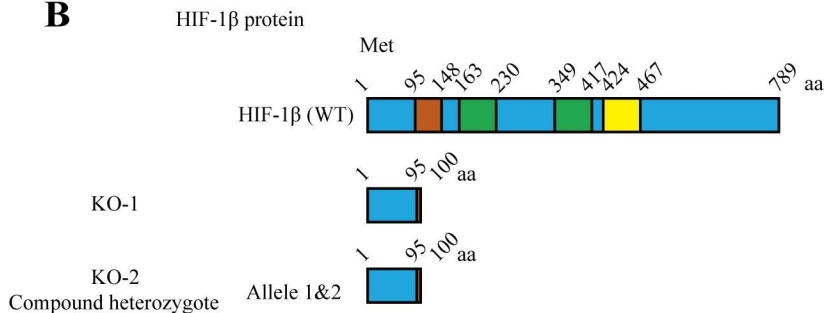

β-catenin-binding domain  
\* 20 \* 40 \* 60 \* 80 \* 100 \* 120  
hTCF7 : MPQLDSSGGGGAG-----GGDDLGAPEDELLAFQDEGEEQDDKSRDSAA--GPERDLAELKSSSLVNESEGAAGGAGIPGVPAGAGARGEAEALGREHAAQRLFPDKLPE : 101  
mTCF7 : -----  
zTcf7 : MPQLN--GG-----GGDDLGANDEMIASFKDEG-DHEEKIRESAF--TESDLADLKSSSLVSETEI-----SQSPAVIR-----RGQQDEQRIYSDKR-E : 77  
xTcf7 : MPQMN--SA-----GEDDLGASDEMISFKDEG-DQEEKIRESAF--TERDLADLKSSSLVNESEV-----SSHPRVPESHPEAMRRRTQDAQLVYQDKLTD : 84  
hTCF7L1 : MPQLG--GGGGGGGGSSGGGGSSAGAAGGGDDLGADELIPFQDEGGEEQEPSSDSAS--AQRDLEVKSSSLVNESE-----NQSSSSDSE-AERRPQ--PVRDTFQ-KPRD : 100  
mTCF7L1 : MPQLG--GGRGGGAG--GGGGGSGAGATSGGDDLGADELIPFQDEGGEEQEPSSDSAS--AQRDLEVKSSSLVNESE-----NQSSSSDSE-AERRPQ--PARDAFQ-KPRD : 98  
zTcf711a : MPQLN--GG-----GGDDLGADELISFKDEG-EQEEKISENVS--SERDLDEVKSSSLVNESE-----NNSSSSDSEQTDRRPRPRPDLESYE-KQRE : 82  
zTcf711b : MPQLN--GG-----GGDELGANDEMISFKDEG-EQEDKISENVS--AERDLDDVKSSSLVNESE-----NNSSSSDSEQTDERRPQPRADLESYE-KARE : 82  
xTcf711 : MPQLN--SG-----GGDELGANDELIRFKDEG-EQEEKSPGESS--AEGDLADVKSSSLVNESE-----NHSSSDSSE-VERRP--PPRETFE-KPRD : 78  
hTCF7L2 : MPQLN--GG-----GGDDLGADELISFKDEG-EQEEKSENSS--AERDLADVKSSSLVNESE-----NQSSSSDSE-AERRPP--PRSESFRDKSRE : 81  
mTCF7L2 : MPQLN--GG-----GGDDLGADELISFKDEG-EQEEKSENSS--AERDLADVKSSSLVNESE-----NQSSSSDSE-AERRPP--PRSESFRDKSRE : 81  
zTcf712 : MPQLN--GG-----GGDDLGADELISFKDEG-EQEEKISENVS--SERDLDEVKSSSLVNESE-----NNSSSSDSEQTDRRPRPRPDLESYE-KQRE : 82  
xTcf712 : MPQLN--GG-----GGDDLGADELISFKDEG-EQEEKISEISS--AERDLADVKSSSLVNESE-----PNSSSSDSE-AERRPP--PRSESFRDKSRE : 81  
hLEF1 : MPQLS--GGGGGG-----GDPELCATDEMIPFKDEGDPQKEKIFAEISHPEEEGDLADIKSSSLVNESE-----IIPASNGHEVVRQAP--SSQEPYHDKARE : 89  
mLEF1 : MPQLS--GGGGG-----GDPELCATDEMIPFKDEGDPQKEKIFAEISHPEEEGDLADIKSSSLVNESE-----IIPASNGHEVVRQAP--SSQEPYHDKARE : 87  
zLef1 : MPQLS--GGGGG-----GDPELCATDEMIPFKDEGDPHKEQIFAEISHSEEEGDLAEIKSSSLVNETE-----ISPNSNSHDAARQSQ--ITPDSYHEKHRD : 87  
xLef1 : MPQLS--GGGGG-----GDPELCATDEMIPFKDEGDPQKEKIYAEISNPEEEGDLADIKSSSLVNETE-----IIPSSNSHEISRRLR--QDSYHEKSRE : 88  
mpq gg g l a d e f deg e dl ksslvne e k

\* 140 \* 160 \* 180 \* 200 \* 220 \* 240  
hTCF7 : PLEDGLKAPECTSGMYKETVYSAFN--LLMHY---PPPSGAGQHP---Q----- : 142  
mTCF7 : -----MYKETVYSAFN--LLMPY---PPASGAGQHP---Q----- : 27  
zTcf7 : HLDDVVK--HHDGGMYKAP-YSGYP-FLMLP---EPYLPNGPVSPS : 117  
xTcf7 : HMEDGVK--HQDEGMYKSGYPSYP-FLMLS---DPYLSNGSVSALS : 125  
hTCF7L1 : YFAEVRR--PQSAFFKGPYPYGP-FLMIPDLSS-PYLSNGPLSPGGART-----YLQMKWPLLDVPS-----SATVKDTRSPSPAHL : 176  
mTCF7L1 : YFAEVRR--PQDGAFFKGPYPYGP-FLMIPDLSS-PYLSNGPLSPGGART-----YLQMKWPLLDVPS-----SATVKDTRSPSPAHL : 186  
zTcf711a : YFAEALRR--QDGGFFKGPYPYGP-FLMIPDLSS-PYLSNGPLSPGGART-----YLQMKWPLLDVPS-----SATVKDTRSPSPAHL : 158  
zTcf711b : YFTEALRR--QDGCFFKSPHYPGYP-FLMIPDLAN-PYLSNGALS-PART-----YLQMKWPLLDVPS-----SAALKDSRSPSPGHL : 158  
xTcf711 : YLSEAFRR--QDAAFFKGPYPYGP-FLMIPDLSS-PYLSNGALS-PART-----YLQMKWPLLDVPS-----TAGLKDARSPPAHL : 154  
hTCF7L2 : SLEEAAR--RQDGLFKGPYPYGP-FLMIPDLSS-PYLSNGALS-PART-----YLQMKWPLLDVPS-----SAALKDSRSPSPGHL : 185  
mTCF7L2 : SLEEAAR--RQDGLFKGPYPYGP-FLMIPDLSS-PYLSNGALS-PART-----YLQMKWPLLDVPS-----SAALKDSRSPSPGHL : 162  
zTcf712 : YFAEALRR--QDGGFFKGPYPYGP-FLMIPDLSS-PYLSNGALS-PART-----YLQMKWPLLDVPS-----SAALKDSRSPSPGHL : 158  
xTcf712 : SLEDAAR--RPDGLFKGPYPYGP-FLMIPDLSS-PYLSNGALS-PART-----YLQMKWPLLDVPS-----SAALKDSRSPSPGHL : 181  
hLEF1 : HPDD-GKH-PDGGLYNKGPSYSSSYGYIMPMNNDPYMSNGSLSPPIPTS-----FMQYLYQMKWPLLDVPS-----SATVKDTRSPSPAHL : 139  
mLEF1 : HPDE-GKH-PDGGLYNKGPSYSSSYGYIMPMNNDPYMSNGSLSPPIPTS----- : 137  
zLef1 : HPDD-GKL-QD--LYSKGHPYPSYPGYIMMTNMNNEPYMNGSLSPPIPTS----- : 135  
xLef1 : HPEDAGKH-PDGGLYNKGPSYSSSYGYIMPMNNDPYMSNGSLSPPIPTS----- : 139  
K Y 5 666p py ng sp

\* 260 \* 280 \* 300 \* 320 \* 340 \* 360  
hTCF7 : --POPPLH-KANQPPHGVQPLS-LYEHFNS-PHPTAPADI-SQKQ-VHRPLQTPDLSGFYSLTSGSMGQLPHTVSW-----FTHPSL : 218  
mTCF7 : --POPPLHNKPGQPPHGVQPLSPLYEHFSS-PHPTAPADI-SQKQGVHRPLQTPDLSGFYSLTSGSMGQLPHTVSWSPSP---PLYPLSPSCGYRQHFP---APTAAPGAPYPRFTHPSL : 137  
zTcf7 : --NKVSVVQ--GMHPLTPLLPIY--EHFNP--SPTHMPTDG-GQKPGVHR-HQTQEISGFYSLPQ---GQITPSMNWFS-----HSLM : 187  
xTcf7 : --SKVPVVQ--SHGVHPLIPYNNEFSHGSHTHLPADL-NQKQGVHRPAQTADIPFYPLPSGGVQI SPVGVWF-----HPLM : 202  
hTCF7L1 : --NKVPVQHPPHMHPLTPLITYSNDHFSPPSPHLSPEI-DPKTGIPRPHSPSELSPIYPLSPGAVGQIPHPLGLWLVPPQGQPMYSLPPGGFRHPYP-ALAMNASMSSLVSSRFSPHM : 292  
mTCF7L1 : RSNKVPVQHPPHMHPLTPLITYSNDHFSPPSPHLSPEI-DPKTGIPRPHSPSELSPIYPLSPGAVGQIPHPLGLWLVPPQGQPMYSLPPGGFRHPYP-ALAMNASMSSLVSSRF- : 303  
zTcf711a : --NKVPVQHPPHMHPLTPLITYSNEHFSPTGPPSHLSPEILDPKTGIPRPHSPSELSPIYPLSPGAVGQIPHPLGLWLVPPQGQPMYSLPPGGFRHPYP-ALAMNASMSSLVSSRFSPHM : 275  
zTcf711b : --NKVPVQH--AHMHPLTPLITYSNE-FPPGTPPAHLSPEILDPKTGIPRPHSPSELSPIYPLSPGAVGQIPHPLGLWLVPPQGQPMYSLPPGGFRHPYP-ALAMNASMSSLVSSRFSPHL : 273  
xTcf711 : --NKVPVQHPPHMHPLTPLITYSNEHFSPTGPPSHLSPEI-DPKTGIPRPHSPSELSPIYPLSPGAVGQIPHPLGLWLVPPQGQPMYSLPPGGFRHPYP-ALAMNASMSSLVSSRFSPHM : 270  
hTCF7L2 : --NKVPVQHPPHMHPLTPLITYSNEHFSPTGPPSHLSPEI-DPKTGIPRPHSPSELSPIYPLSPGAVGQIPHPLGLWLVPPQGQPMYSLPPGGFRHPYP-ALAMNASMSSLVSSRFSPHM : 297  
mTCF7L2 : --NKVPVQHPPHMHPLTPLITYSNEHFSPTGPPSHLSPEI-DPKTGIPRPHSPSELSPIYPLSPGAVGQIPHPLGLWLVPPQGQPMYSLPPGGFRHPYP-ALAMNASMSSLVSSRFSPHM : 274  
zTcf712 : --NKVPVQHPPHMHPLTPLITYSNEHFSPTGPPSHLSPEILDPKTGIPRPHSPSELSPIYPLSPGAVGQIPHPLGLWLVPPQGQPMYSLPPGGFRHPYP-ALAMNASMSSLVSSRFSPHM : 275  
xTcf712 : --NKVPVQHPPHMHPLTPLITYSNEHFSPTGPPSHLSPEILDPKTGIPRPHSPSELSPIYPLSPGAVGQIPHPLGLWLVPPQGQPMYSLPPGGFRHPYP-ALAMNASMSSLVSSRFSPHM : 298  
hLEF1 : --NKVPVQPSHAVHPLTPLITYSDEHFSPTGPPSHLSPEILDPKTGIPRPHSPSELSPIYPLSPGAVGQITPPLGWQ---QPVPYIT-GGFRQPYPSLSVDTSMS----RFSHHM : 246  
mLEF1 : --NKVPVQPSHAVHPLTPLITYSDEHFSPTGPPSHLSPEILDPKTGIPRPHSPSELSPIYPLSPGAVGQITPPIGWQ---QPVPYIT-GGFRQPYPSLSVDTSMS----RFSHHM : 244  
zLef1 : --NKVPVQPSHAVHPLTPLITYSDEHFSPTGPPSHLSPEILDPKTGIPRPHSPSELSPIYPLSPGAVGQITPPLGWQ---QPVPYIT-GGFRQPYPSLSVDTSMS----RFSHHM : 215  
xLef1 : --NKVPVQPSHAHPLTPLITYSDEHFSPTGPPSHLSPEILDPKTGIPRPHSPSELSPIYPLSPGAVGQITPPLGWQ---QPVPYIT-GGFRQPYPSLSVDTSMS----RFSHHM : 218  
nkvp6vq hp tPl6 y ehF p p h g6 R 6 5YpL g VGQ6 6gW 6

HMG-DBD  
\* 380 \* 400 \* 420 \* 440 \* 460 \* 480  
hTCF7 : MLGSGVPGHPAAIPHPAIVPSSGKQELQPFDR---NLKTQAESKAKEKAKKPTIKKPLNAFMLYMKEMRAKVIAECTLKESAAINQILGRRWHALSREEQAKYYELARKERQLHMQLYPG : 335  
mTCF7 : MLGSGVPGHPAAIPHPAIVPSSGKQELQPYDR---NLKTQAEPKAEKAKKPVIKKPLNAFMLYMKEMRAKVIAECTLKESAAINQILGRRWHALSREEQAKYYELARKERQLHMQLYPG : 254  
zTcf7 : LQS---GMHTGIPHPAIVPSSGKQEHQDFDRSI-YNKSHAEAKREKPKKPVIKKPLNAFMLYMKEMRAKVIAECTLKESAAINQILGRRWHALSTREEQAKYYELARKERQLHVQLYPS : 303  
xTcf7 : LS---PSMHTTGIPHPAIVPSSGKQEHQDFDRSI-YNKSHAEAKREKPKKPVIKKPLNAFMLYMKEMRAKVIAECTLKESAAINQILGRRWHALSREEQAKYYELARKERQLHMQLYPG : 316  
hTCF7L1 : VAPAHPLPTSGIPHPAIVSPIVKQEPAPPSLSPAVSAKSPVTVKKEEKKPHVKKPLNAFMLYMKEMRAKVIAECTLKESAAINQILGRRWHALSREEQAKYYELARKERQLHQAQLYPT : 412  
mTCF7L1 : VAPAHPLPTSGIPHPAIVSPIVKQEPAPPSLSPAVSAKSPVTVKKEEKKPHVKKPLNAFMLYMKEMRAKVIAECTLKESAAINQILGRRWHALSREEQAKYYELARKERQLHQAQLYPT : 423  
zTcf711a : VPHPPHGLHQTGIPHPAIVSPAIVKQEPNGESPSNSTHGKPSVPVKKEEKKPHVKKPLNAFMLYMKEMRAKVIAECTLKESAAINQILGRRWHALSREEQAKYYELARKERQLHSQLYPG : 395  
zTcf711b : VPHPPHGLHQTGIPHPAIVSPAIVKQEPNGE-LSPVVNTKSPGNKKDEDKPHVKKPLNAFMLYMKEMRAKVIAECTLKESAAINQILGRRWHALSREEQAKYYELARKERQLHSQLYPG : 392  
xTcf711 : VPPPHGLHQTGIPHPAIVSPAIVKQEPSSNGISPNLITKPSVTVKKEEKKPHVKKPLNAFMLYMKEMRAKVIAECTLKESAAINQILGRRWHALSREEQAKYYELARKERQLHSQLYPT : 390  
hTCF7L2 : VPP-HHTLHTTGIPHPAIVTPTVKQESSQSDVGLSHSSKHQDSKKEEKKPHVKKPLNAFMLYMKEMRAKVIAECTLKESAAINQILGRRWHALSREEQAKYYELARKERQLHMQLYPG : 416  
mTCF7L2 : VPP-HHTLHTTGIPHPAIVTPTVKQESSQSDVGLSHSSKHQDSKKEEKKPHVKKPLNAFMLYMKEMRAKVIAECTLKESAAINQILGRRWHALSREEQAKYYELARKERQLHMQLYPG : 393  
zTcf712 : VPHPPHGLHQTGIPHPAIVSPAIVKQEPNGESPSNSTHGKPSVPVKKEEKKPHVKKPLNAFMLYMKEMRAKVIAECTLKESAAINQILGRRWHALSREEQAKYYELARKERQLHSQLYPG : 395  
xTcf712 : VPP-HHSLHTTGIPHPAIVTPTVKQESSQSDVGLSHSSKHQDSKKEEKKPHVKKPLNAFMLYMKEMRAKVIAECTLKESAAINQILGRRWHALSREEQAKYYELARKERQLHMQLYPG : 417  
hLEF1 : IPG-PPGPHTTGIPHPAIVTPTVKQEHPTDSDLMHVKQHEQRKEQEPKPHVKKPLNAFMLYMKEMRANVVAECTLKESAAINQILGRRWHALSREEQAKYYELARKERQLHMQLYPG : 365  
mLEF1 : IPG-PPGPHTTGIPHPAIVTPTVKQEHPTDSDLMHVKQHEQRKEQEPKPHVKKPLNAFMLYMKEMRANVVAECTLKESAAINQILGRRWHALSREEQAKYYELARKERQLHMQLYPG : 363  
zLef1 : VPG-PPGPHTTGIPHPAIVTPTVKQEH---DTDLMMHKQHEQRKEQEPKPHVKKPLNAFMLYMKEMRANVVAECTLKESAAINQILGRRWHALSREEQAKYYELARKERQLHMQLYPG : 331  
xLef1 : VSG-PPGPHTTGIPHPAIVTPTVKQEHPHNDNDLMHMKPHHEQRKEQEPKPHVKKPLNAFMLYMKEMRANVVAECTLKESAAINQILGRRWHALSREEQAKYYELARKERQLHMQLYPG : 337  
6 h giphaIv p Kqe E K4P 6KKPLNAFMLYMKEMRA V6AECTLKESAAINQILGR4WH L3REeQaKYYELARKERQLH QLYP

HMG-DBD NLS  
\* 500 \* 520 \* 540 \* 560 \* 580 \* 600  
hTCF7 : WSARDNY---GKKKRSRE-KHQESTTGGK-----RNAFGTYPEKAAAPAPFLPMTVL----- : 384  
mTCF7 : WSARDNY---GKKKRSRE-KHQESTTGGK-----RNAFGTYPEKAAAPAPFLPMTVL----- : 303  
zTcf7 : WSARDNYVSALGKKKRKRQDSSSTGPG-----SPKKCRARFG-----LNQQTDCGPCR----- : 355  
xTcf7 : WSARDNY---GKKKRSRE-KHQDSSSDPG-----SPKKCRARFG-----LNQQTDCGPCR----- : 364  
hTCF7L1 : WSARDNY---GKKKRSRE-KQLSQTQSQQVQEAEGALASKSKKPCVQYLPEK-----PCDSPASSHGSM LSPATPSAALASPAAPAAHSEQAQPLSLTTKPEARAQLAL- : 517  
mTCF7L1 : WSARDNY---GKKKRSRE-KQLSQTQSQQVQEAEGALASKSKKPCVQYLPEK-----PCDSPASSHGSM LSPATPSAALASPAAPAAHSEQAQPLSLTTKPEARAQLAL- : 528  
zTcf711a : WSARDNY---GKKKRSRE-KQDSSSTGPG-----FSPQPKKCVYLSSEK-----MCDSPSSHGSM LSPATPSAALASPAAPAAHSEQAQPLSLTTKPEGRAHNNHP : 493  
zTcf711b : WSARDNY---GKKKRSRE-KQDSTPEI-----FSMRSKPCVQYLPEK-----MIDSPSSHGSM LSPATPSAALASPAAPAAHSEQAQPLSLTTKPEARAQLAL- : 489  
xTcf711 : WSARDNY---GKKKRSRE-KQSPEMEIT-----KTKMVCVQLPADK-----SCDSPASSHGSM LSPATPSAALASPAAPAAHSEQAQPLSLTTKPEARAQLAL- : 484  
hTCF7L2 : WSARDNY---GKKKRSRE-KQGETNDANTPKKCRALFGLDRQTLWCKPCRRKKCVRYIQGEGSCLSPSSDGLSLDPPSPNLLGSPPRDAKSQTEQTQPLSLSLKPDPLAHLMS : 531  
mTCF7L2 : WSARDNY---GKKKRSRE-KQGETN-----EHSECLNPLCS-----LPPITD-----LSAPKKCRARFG-----LDQNNWCGPCSL----- : 459  
zTcf712 : WSARDNY---GKKKRSRE-KQDSSSTGPG-----FSPQPKKCVYLSSEK-----MCDSPSSHGSM LSPATPSAALASPAAPAAHSEQAQPLSLTTKPEGRAHNNHP : 493  
xTcf712 : WSARDNY---GKKKRSRE-KQGEAN-----EHSECLNPLCS-----LPPITE-----GKRSAFATYK-----VKAALARPLQMEAY----- : 483  
hLEF1 : WSARDNY---GKKKRSRE-KLQESASGTG-----PRMTAAYI----- : 399  
mLEF1 : WSARDNY---GKKKRSRE-KLQESTSGTG-----PRMTAAYI----- : 397  
zLef1 : WSARDNY---GKKKRSRE-KIQEPASGTG-----QRMKTAAYI----- : 365  
xLef1 : WSARDNY---GKKKRSRE-KLQESTSGAGP-----PRMTAAYI----- : 372  
WSARDNY GK4K4rK R K a

\* 620 \* 640 \* 660 \*  
hTCF7 : ----- : -  
mTCF7 : ----- : -  
zTcf7 : ----- : -  
xTcf7 : ----- : -  
hTCF7L1 : HSAAFLSAKAAAASS--SQMGSQP--PLLSRPLPLGSMPTALLASP-PSFPATLHAHQALPVLQAQPLSLVTKSAH : 588  
mTCF7L1 : HSAAFLSAKAAAASN--SSQMGSQP--PLLSRPLPLGSMPTALLASP-PTFPATLHAHQALPVLQAQPLSLVTKSAH : 599  
zTcf711a : HFPLPGKSSGSGS-----SSMALHLSLRPIPFTSLPPLSLLGPNSPFHQAALHSHHAL--LQTQPLSLVTKSVE : 560  
zTcf711b : -----PSSSSSSSS-----SSGLP--TPPLLSRPLPFALLTPSPFHQAALHSHHAL--FQSQPLSLVTKSSD : 550  
xTcf711 : HSAAFLSAKSPSSSSLSGSLSPVGSPLLSRPIPLTSS---ILSPP-CVFPS---ALQALPLLQAQPLSLVTKSSD : 553  
hTCF7L2 : MPPPPALLLAEATHK-----ASALCPNGALDLPAAALQPAAPSSSIAQPSTSSLHSHSLAGTQPQPLSLVTKSL : 602  
mTCF7L2 : ----- : -  
zTcf712 : HFPLPGKSSGSGS-----SSMALHLSLRPIPFTSLPPLSLLGPNSPFHQAALHSHHAL--LQTQPLSLVTKSVE : 560  
xTcf712 : ----- : -  
hLEF1 : ----- : -  
mLEF1 : ----- : -  
zLef1 : ----- : -  
xLef1 : ----- : -

Figure 4-figure supplement 1

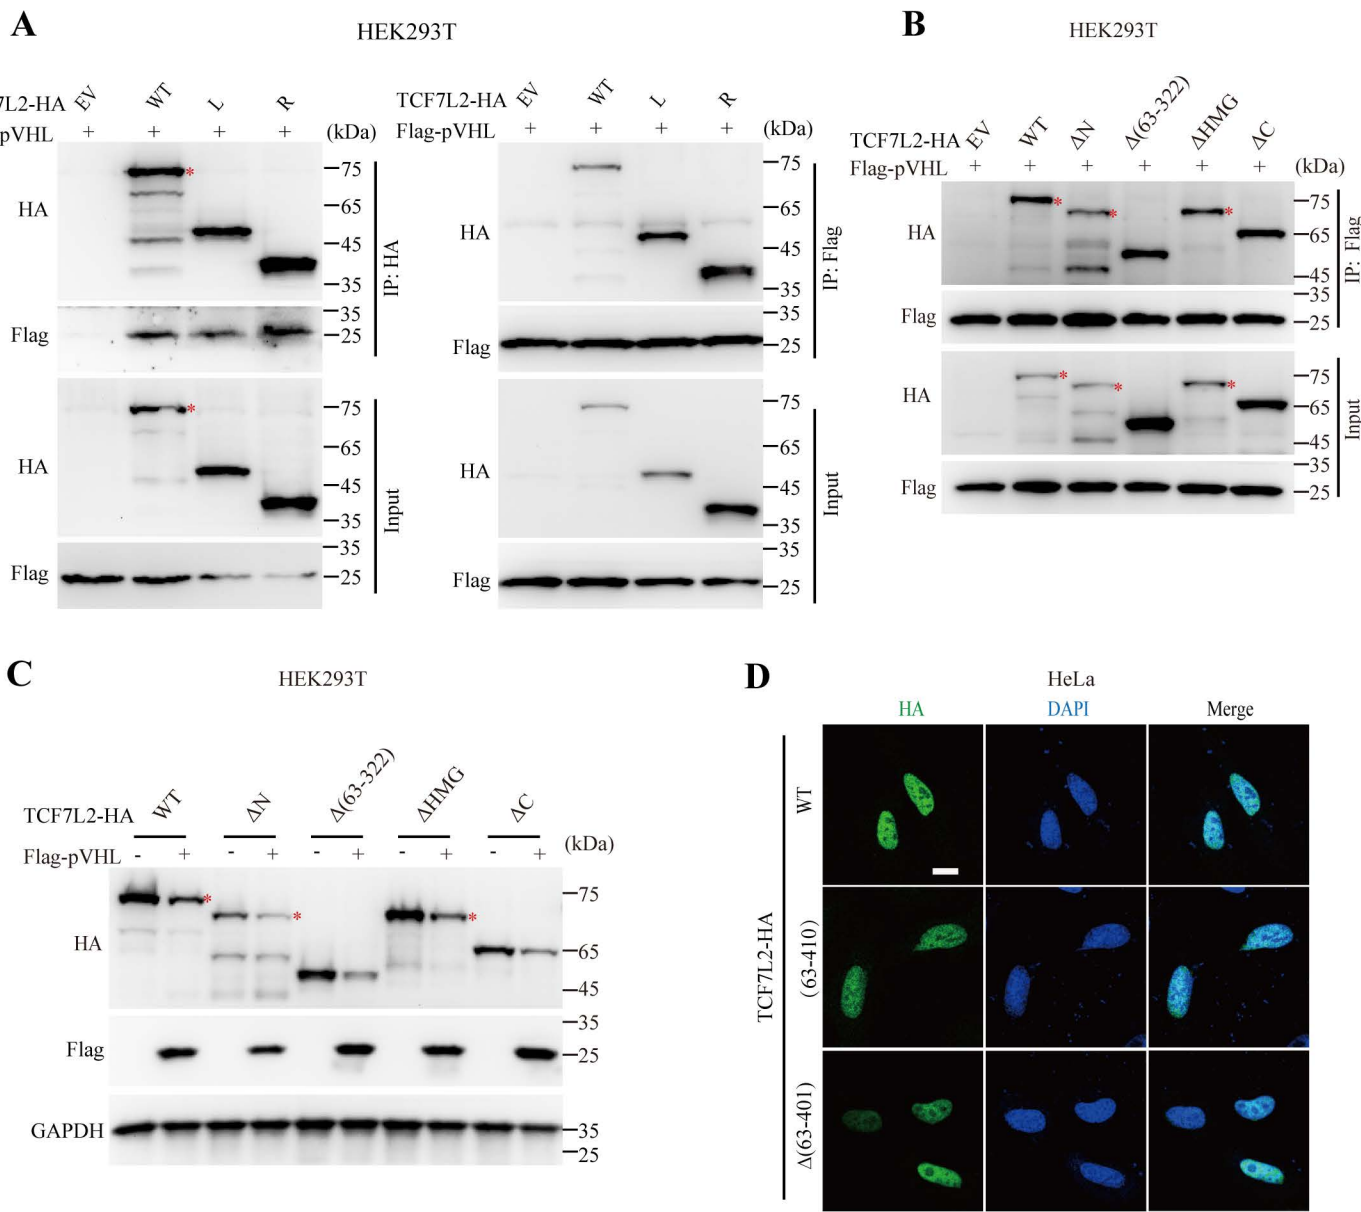

Figure 6-figure supplement 1

**A**

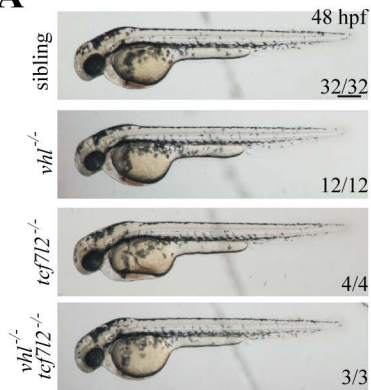

**D**

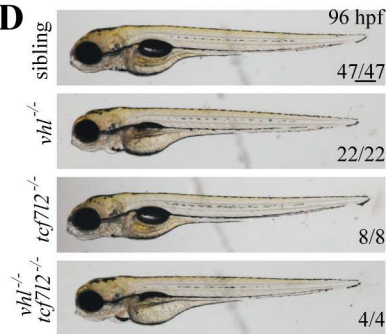

**B**

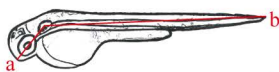

**C**

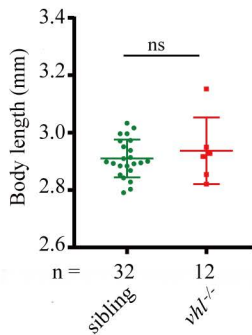

**E**

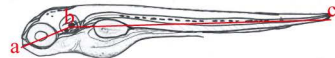

**F**

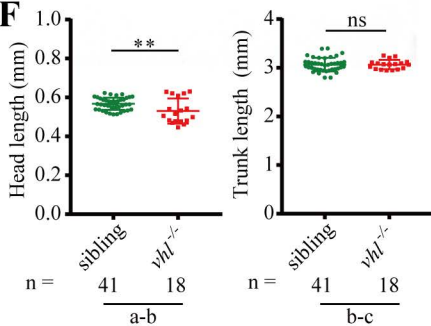

Figure 6-figure supplement 2

**A**

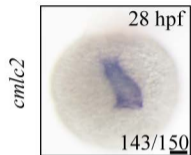

**B**

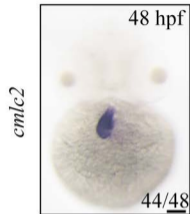

**C**

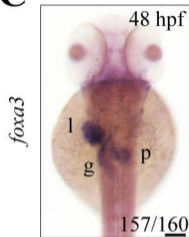

**D**

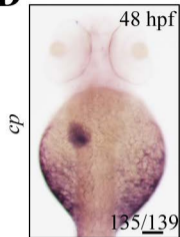

**E**

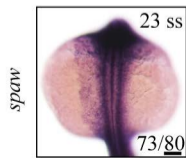

**F**

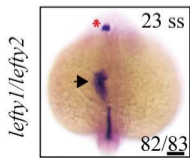

**G**

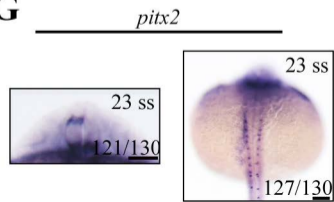

**Table S1 Primers and sequence information.**

| name                         | Sequence (5'-3')                              |
|------------------------------|-----------------------------------------------|
| <i>TCF7</i> -qF              | G TTCACCCACCCATCCTTGATGC                      |
| <i>TCF7</i> -qR              | CAGCCTGGGTATAGCTGCATGTG                       |
| <i>TCF7L1</i> -qF            | G TCAACGAGTCGGAGAACCA                         |
| <i>TCF7L1</i> -qR            | TCTCACTTCGGCGAAATAGTC                         |
| <i>TCF7L2</i> -qF            | CCTCGGCAGAGAGGGATTAGCTG                       |
| <i>TCF7L2</i> -qR            | GAGCCCTCCATCTTGCCTCTTG                        |
| <i>β-ACTIN</i> -qF           | A CCCTGAAGTACCCCATCGAG                        |
| <i>β-ACTIN</i> -qR           | G GATAGCACAGCCTGGATAGCA                       |
| <i>VHL</i> -CAS9-Target-F    | G GACGAAACACCGATACGGGCAGCACGACGCGGTTTTAGAGCTA |
| <i>VHL</i> -CAS9-Target-R    | T TTCTAGCTCTAAAACCGCGTCGTGCTGCCCGTATCGGTGTTTC |
| <i>VHL</i> -CAS9-Test-F      | G CGTTCCATCCTCTACCG                           |
| <i>VHL</i> -CAS9-Test-R      | G GGCTTCAGACCGTGCTAT                          |
| <i>HIF1-β</i> -CAS9-Target-F | G GACGAAACACCGTGAAATTGAACGGCGGCGAGTTTTAGAGCTA |
| <i>HIF1-β</i> -CAS9-Target-R | T TTCTAGCTCTAAAACCTCGCCGCGTTCAATTTACGGTGTTTC  |
| <i>HIF1-β</i> -CAS9-Test-F   | C AAGTAATCCACCTGCCTCCATCTC                    |
| <i>HIF1-β</i> -CAS9-Test-R   | T TCCCCGCAAGGACTTCAT                          |
